# Supplementary material for: Modelling historical changes in the force-of-infection of Chagas disease to inform control and elimination programmes: application in Colombia
Source: PubMed Central journal article supplement (PMC5680445; doi:10.1136/bmjgh-2017-000345), 2017-09-07
Supplement: bmjgh-2017-000345supp001.pdf [file bmjgh-2017-000345supp001.pdf]

## Supplementary Data for

# Modelling historical changes in the Force-of-Infection of Chagas disease to inform control and elimination programmes: application in Colombia

Zulma M. Cucunubá\*, Pierre Nouvellet, Lesong Conteh, Mauricio Javier Vera, Víctor

Manuel Angulo, Juan Carlos Dib, Gabriel Parra-Henao, and María-Gloria Basáñez

### \*Corresponding author

Zulma M. Cucunubá  
Department of Infectious Disease  
Epidemiology & London Centre for Neglected  
Tropical Disease Research  
Faculty of Medicine (St Mary's campus)  
Imperial College London, Norfolk Place  
London W2 1PG  
Tel: +44 (0) 207 5943229  
Fax: +44 (0) 207 4023927  
[zulma.cucunuba@imperial.ac.uk](mailto:zulma.cucunuba@imperial.ac.uk)

### This file includes:

#### Supplementary Methods

- Text A.** Systematic Review of Serological Surveys.
- Text B.** Likelihood Expression.
- Text C.** Adjustment of Seroprevalence by Diagnostic Tests.
- Text D.** Exploring Spatial Correlation.

#### Supplementary Figures

**Supplementary Figure 1.** Flowchart of the systematic review conducted to identify and select the serosurveys included in this study.

**Supplementary Figure 2.** Fol per 1,000 population at risk per year vs. year for the period 1984–2014 for 109 individual serosurveys.

**Supplementary Figure 3.** Semivariogram analysis of spatial trend in the Fol for the years a) 1995, b) 2000, c) 2005 and d) 2010.

## **Supplementary Tables**

**Supplementary Table 1.** Characteristics of the serosurveys included in the analyses.

**Supplementary Table 2.** Deviance Information Criterion for selecting the best model fit for the force-of-infection of Chagas disease in Colombia in individual serosurveys.

**Supplementary Table 3** Deviance Information Criterion for selecting the best model fit for subnational-level trends in the force-of-infection of Chagas disease in Colombia.

**Supplementary Table 4.** Deviance Information Criterion for selecting the best model fit for setting-level trends in the force-of-infection of Chagas disease in Colombia.

**Supplementary Table 5.** Comparison of Deviance Information Criterion for selecting the best model fit for aggregated vs. individual serosurveys in Colombia at subnational level and in four different settings

## **Supplementary References**

## Supplementary Methods

### Text A. Systematic Review of Serological Surveys

We conducted a systematic review following the PRISMA guidelines. We systematically searched PubMed, Web of Knowledge datasets, and the Latin American Index (LILACS—Literatura Latinoamericana de Información en Ciencias de la Salud, in Spanish) datasets up to 30 September 2015, with no restrictions applied for year and language of publication using the following terms algorithm ("seroepidemiologic studies"[MeSH Terms] OR "cross-sectional"[All Fields] OR "estimates"[All Fields] OR "seroprevalence"[All Fields] OR "serosurvey"[All Fields] OR "survey"[All Fields] OR "prevalence"[MeSH Terms]) AND ("chagas disease"[MeSH Terms] OR "trypanosoma cruzi"[MeSH Terms]) AND ("colombia"[MeSH Terms] OR "colombia"[All Fields]).

For LILACS database we used the following terms: tw:((chagas disease OR enfermedad de chagas OR doença de chagas) AND colombia AND (prevalence OR seroprevalence OR prevalencia OR prevalência)) AND (instance:"regional").

A flowchart of literature selection process is depicted in Supplementary Figure 1. The details of the literature used in the analyses are listed in Supplementary Table 1.

## Text B. Likelihood Expression

The catalytic models used in the analysis are described in the main text. Here we provide further explanation on the likelihood expression.

Using seroprevalence (binomial) data, and assuming homogeneity across spatial units, for a total of  $S$  surveys within each unit and each component survey  $s$  encompassing  $N_s$  age classes, the likelihood ( $L$ ) of the parameter(s) of interest ( $\theta$ ) given data on the number of seropositives  $c$ , the total number tested  $n$ , and their age  $a$ , is,

$$L(\theta | c, n, a) \propto \prod_{s=1}^S \left[ \prod_{a=1}^{N_s} p_{a,\tau,s}^{c_{a,s}} (1 - p_{a,\tau,s})^{n_{a,s} - c_{a,s}} \right], \quad (\text{S1})$$

where  $c_{a,s}$  and  $(n_{a,s} - c_{a,s})$  are, respectively, the number of seropositive and seronegative individuals in age class  $a$  for survey  $s$ ,  $p_{a,\tau,s}$  corresponds to equations (1–3) in the main text (after adjustment for diagnostic performance as explained in Text C), and  $\theta$  is the set of parameter(s) to be estimated ( $\lambda$  in Model 1, up to five values of  $\lambda$  and up to four values of  $\xi$  in Model 2, and  $\{\lambda_i\}$  in Model 3).

## Text C. Adjustment of Seroprevalence by Diagnostic Tests

Given that the results of the serosurveys depend on the intrinsic diagnostic performance characteristics (*Sensitivity* and *Specificity*) of the assays used, these properties [1] were used to adjust the expected (modelled) seroprevalence using the following expression,

$$p = sens \times P + (1 - spec) \times (1 - P), \quad (S2)$$

where  $p$  is the 'apparent' prevalence,  $P$  is the modelled 'true' prevalence; and  $sens$  and  $spec$  are, respectively, the test sensitivity and specificity [2, 3].

### Sequential testing

In some cases, multiple testing was used in the seroprevalence studies. Typically, for Chagas disease screening, this process is done sequentially (second test,  $B$ , performed only for those who tested positive on the first test,  $A$ ) rather than simultaneously. This sequential testing modifies the net values of sensitivity and specificity, with an overall reduction in sensitivity and an increase in specificity. Based on Bayes theorem, the calculations of net specificity and net sensitivity for sequential testing are as follows [4].

Using the multiplication rule,  $P(A \cap B) = P(A) \times P(B|A)$ . When the two events (in this case the diagnostic performances of the tests) are independent it follows that,  $P(B|A) = P(B)$ . Therefore,  $P(A \cap B) = P(A) \times P(B)$ , and  $NetSensitivity = (A)_{sens} \times (B)_{sens}$ .

By the addition rule of probability,  $P(A \cup B) = P(A) + P(B) - P(A \cap B)$ . Therefore,  $NetSpecificity = (A)_{spec} + (B)_{spec} - [(A)_{spec} \times (B)_{spec}]$ . The expression for 'apparent' prevalence ( $p$ ) becomes,

$$p = NetSensitivity \times P + (1 - NetSpecificity) \times (1 - P) \quad (S3)$$

In cases where three tests were used, given that information on the type and sequence between the second and/or the third tests was not given in the original data sources, we used for the second test the values of sensitivity and specificity for IFAT

(immunofluorescence antibody test), the most commonly used second test for Chagas disease diagnosis.

#### **Text D. Exploring Spatial Correlation**

We explored spatial correlation between the values of the force-of-infection (Fol) derived from the serological surveys (using Model 3 in the main text) by means of the semivariogram method. A semivariogram is a tool used in model-based geostatistics to represent spatial correlation in observations measured at sample locations [5,6]. It is commonly presented as a graph that shows the variance versus distance between all pairs of sampled locations. The expected squared difference between two data values separated by a distance vector  $\mathbf{h}$  is the variogram. The semivariogram  $\gamma(\mathbf{h})$  is one half of the variogram  $2\gamma(\mathbf{h})$ .

Let  $N(\mathbf{h})$  represent the total number of pairs of Fol values separated by lag  $\mathbf{h}$  (plus or minus the lag tolerance). We can then compute the semivariogram statistics for lag  $\mathbf{h}$  as,

$$\gamma(\mathbf{h}) = \frac{1}{2N(\mathbf{h})} \sum_{\alpha=1}^{N(\mathbf{h})} [z(\mathbf{u}_{\alpha}) - z(\mathbf{u}_{\alpha} + \mathbf{h})]^2, \quad (\text{S4})$$

where,  $\mathbf{u}$  is the vector of spatial coordinates for  $\alpha$  locations;  $z(\mathbf{u})$  is the variable under consideration as a function of spatial location (in our case the Fol);  $\mathbf{h}$  is the lag vector representing separation between two spatial locations and  $z(\mathbf{u} + \mathbf{h})$  is the lagged version of the variable under consideration. The resulting semivariance plotted versus the lag is the semivariogram.

Empirical semivariograms were obtained by randomly reassigning the values of Fol at data locations for each permutation. Models were fitted to the empirical semivariogram using a number of functions (e.g. exponential, Gaussian, spherical). If the empirical semivariogram lies outside the randomly generated region, there is a significant spatial trend present in the data, and there is no evidence of spatial trend otherwise (Figure B).

For all the analysed years, the empirical variograms lie inside this region and, therefore, there is no significant spatial correlation between the surveys.

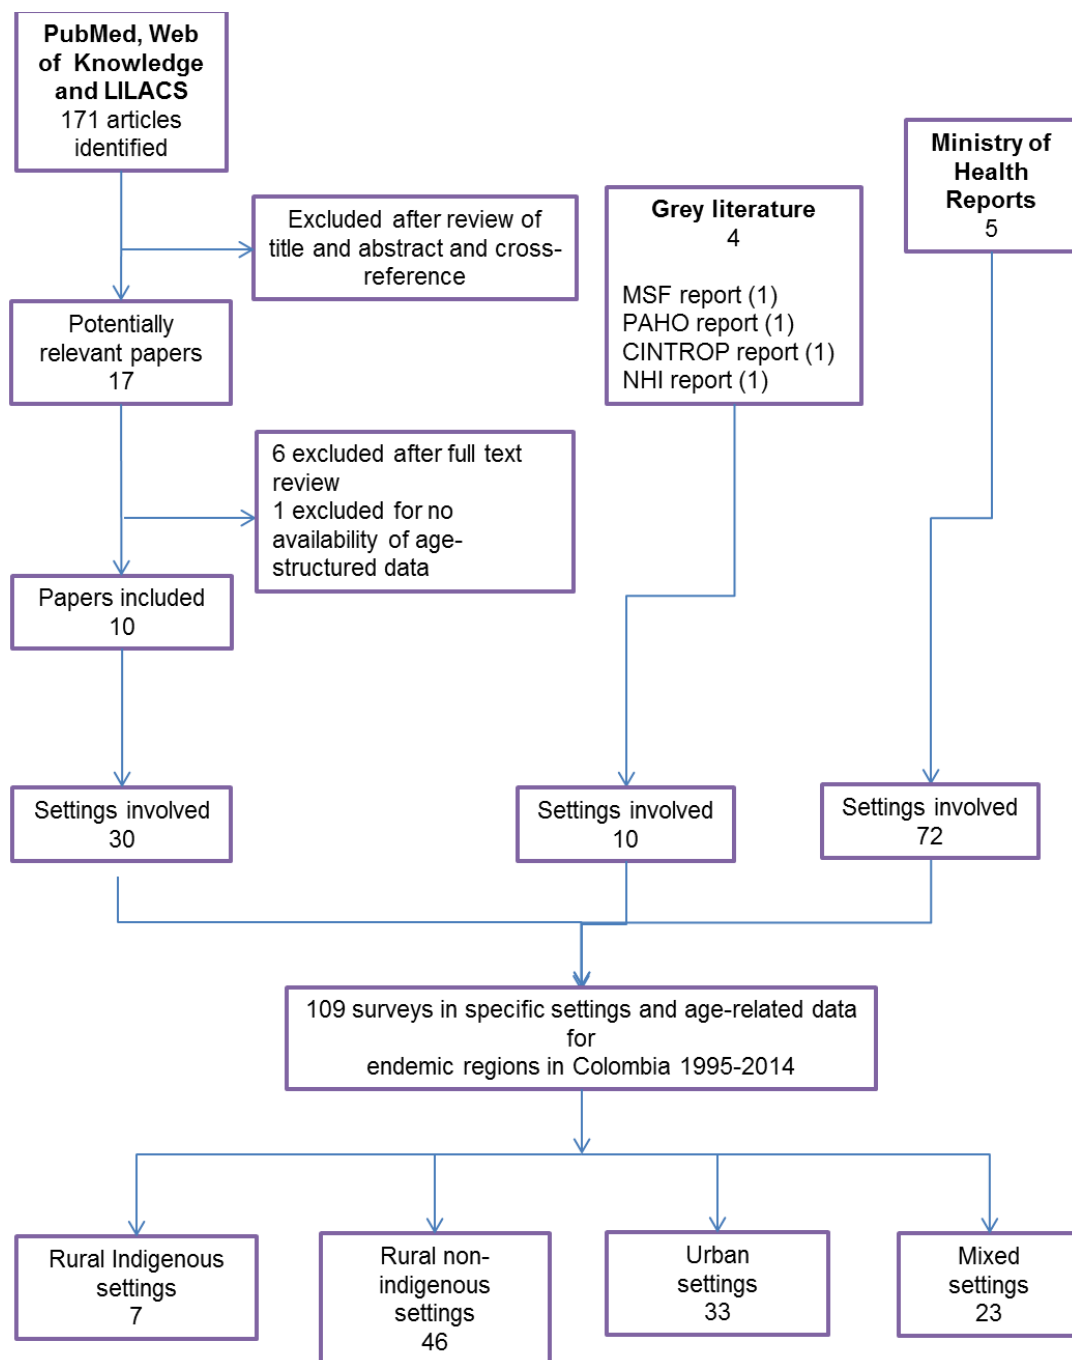

**Supplementary Figure 1. Flowchart of the systematic review conducted to identify and select the serosurveys included in this study.** Abbreviations: LILACS, Literatura Latinoamericana de Información en Ciencias de la Salud; MSF, Médicos Sin Fronteras; PAHO, Pan American Health Organization; CINTROP, Centro de Investigaciones en Enfermedades Tropicales; NHI, National Health Institute, Colombia.

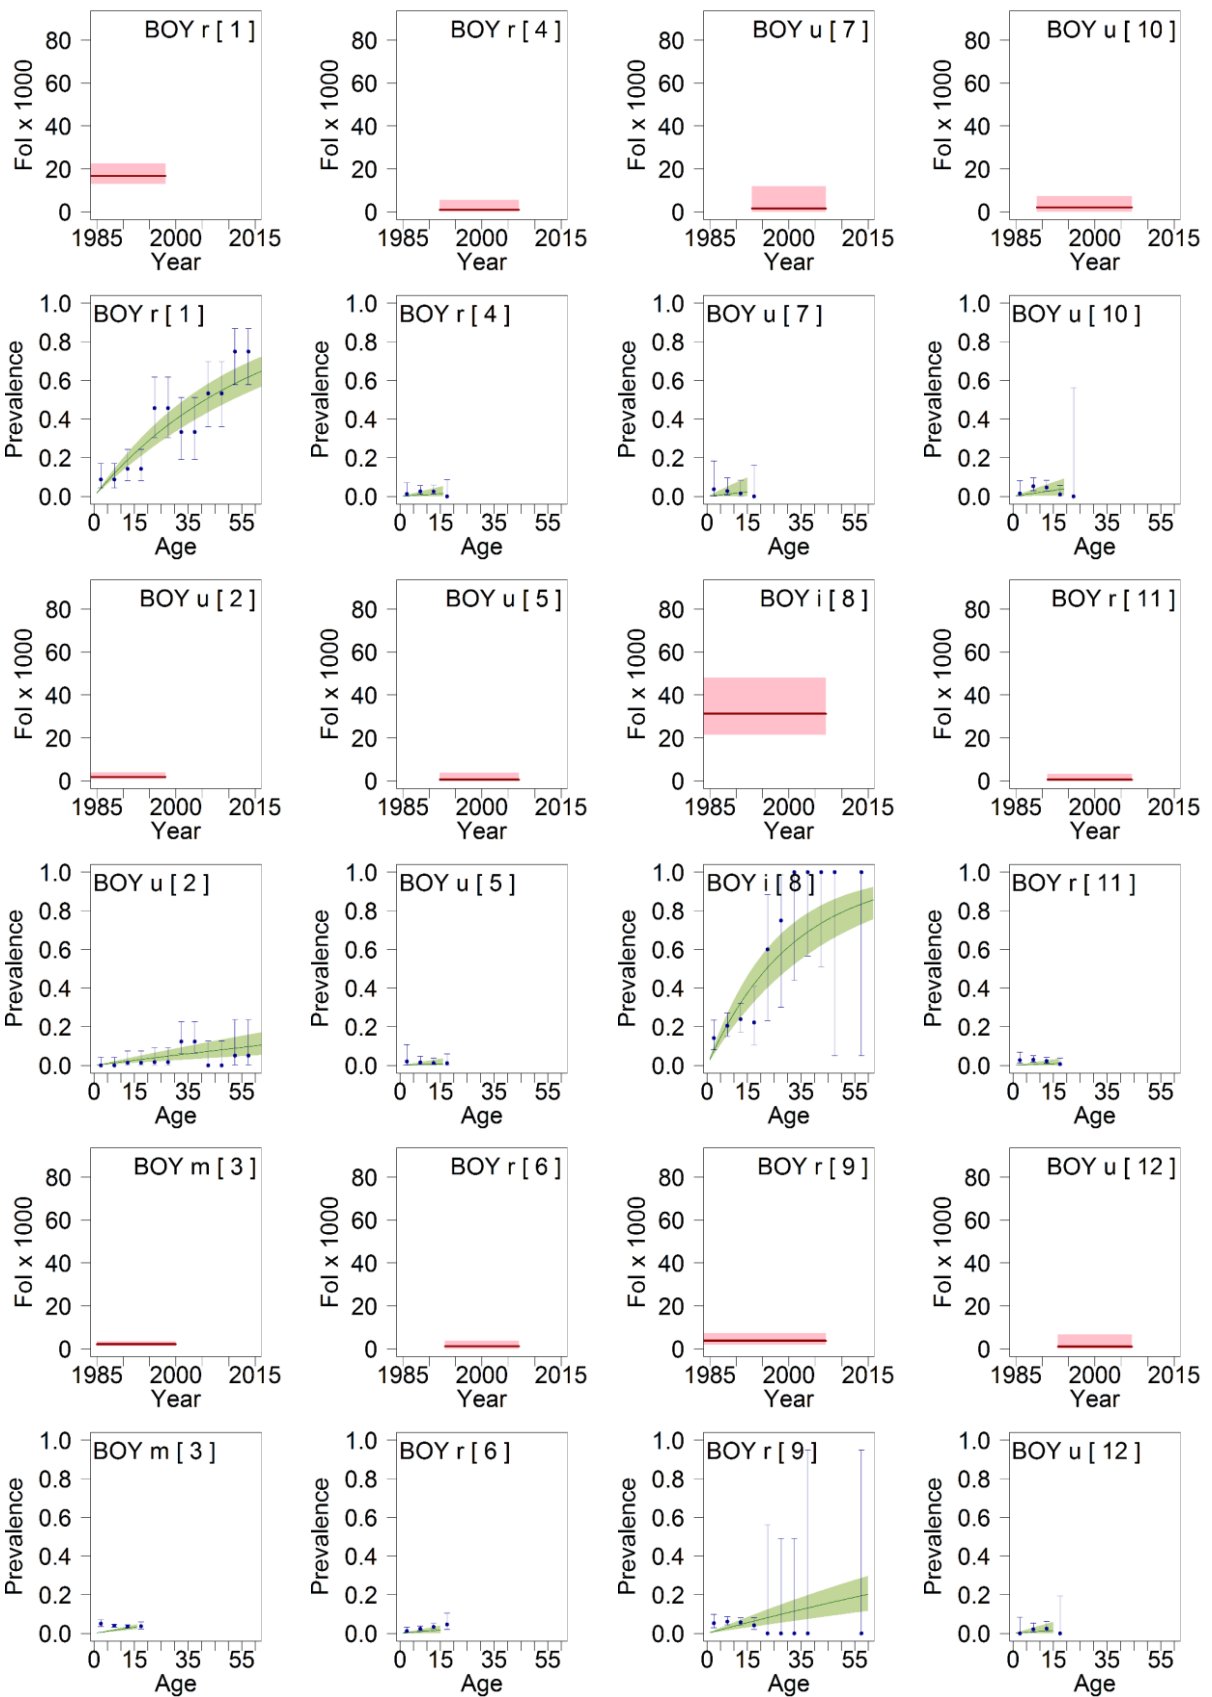



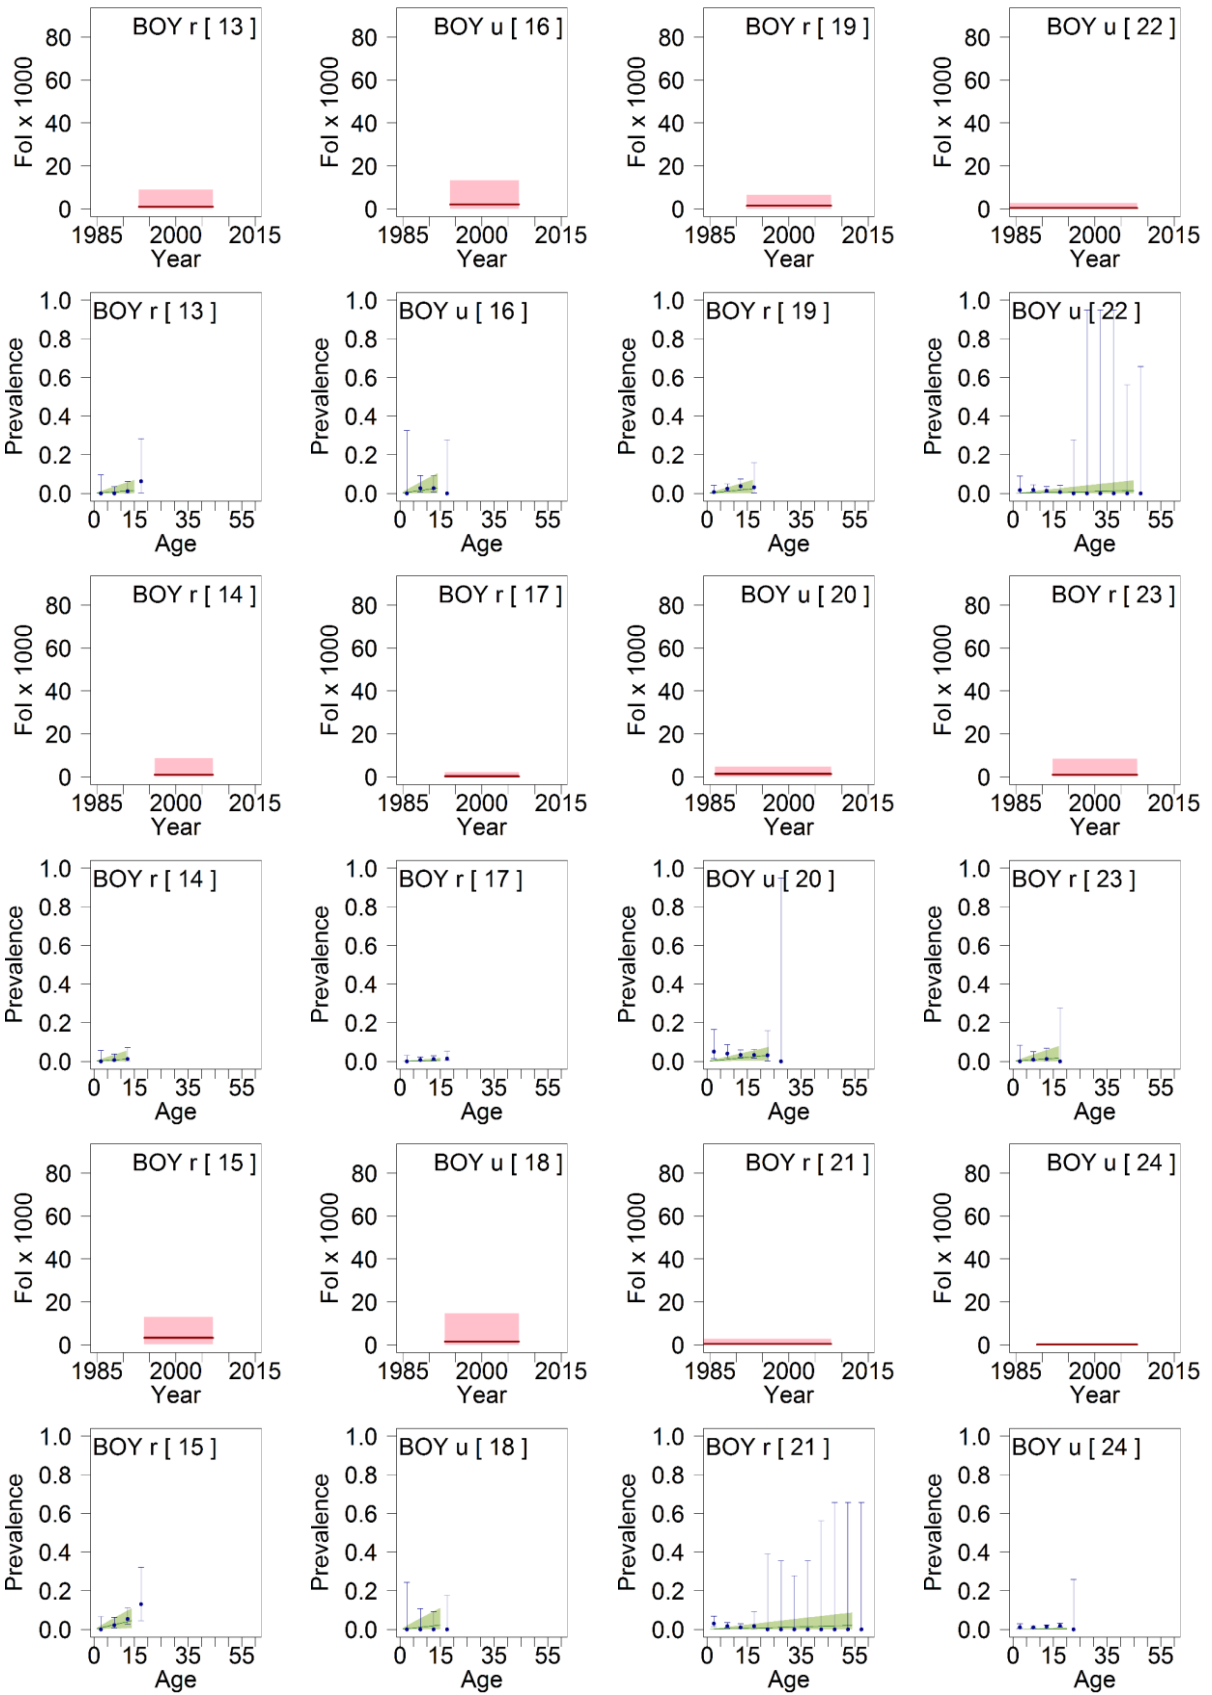

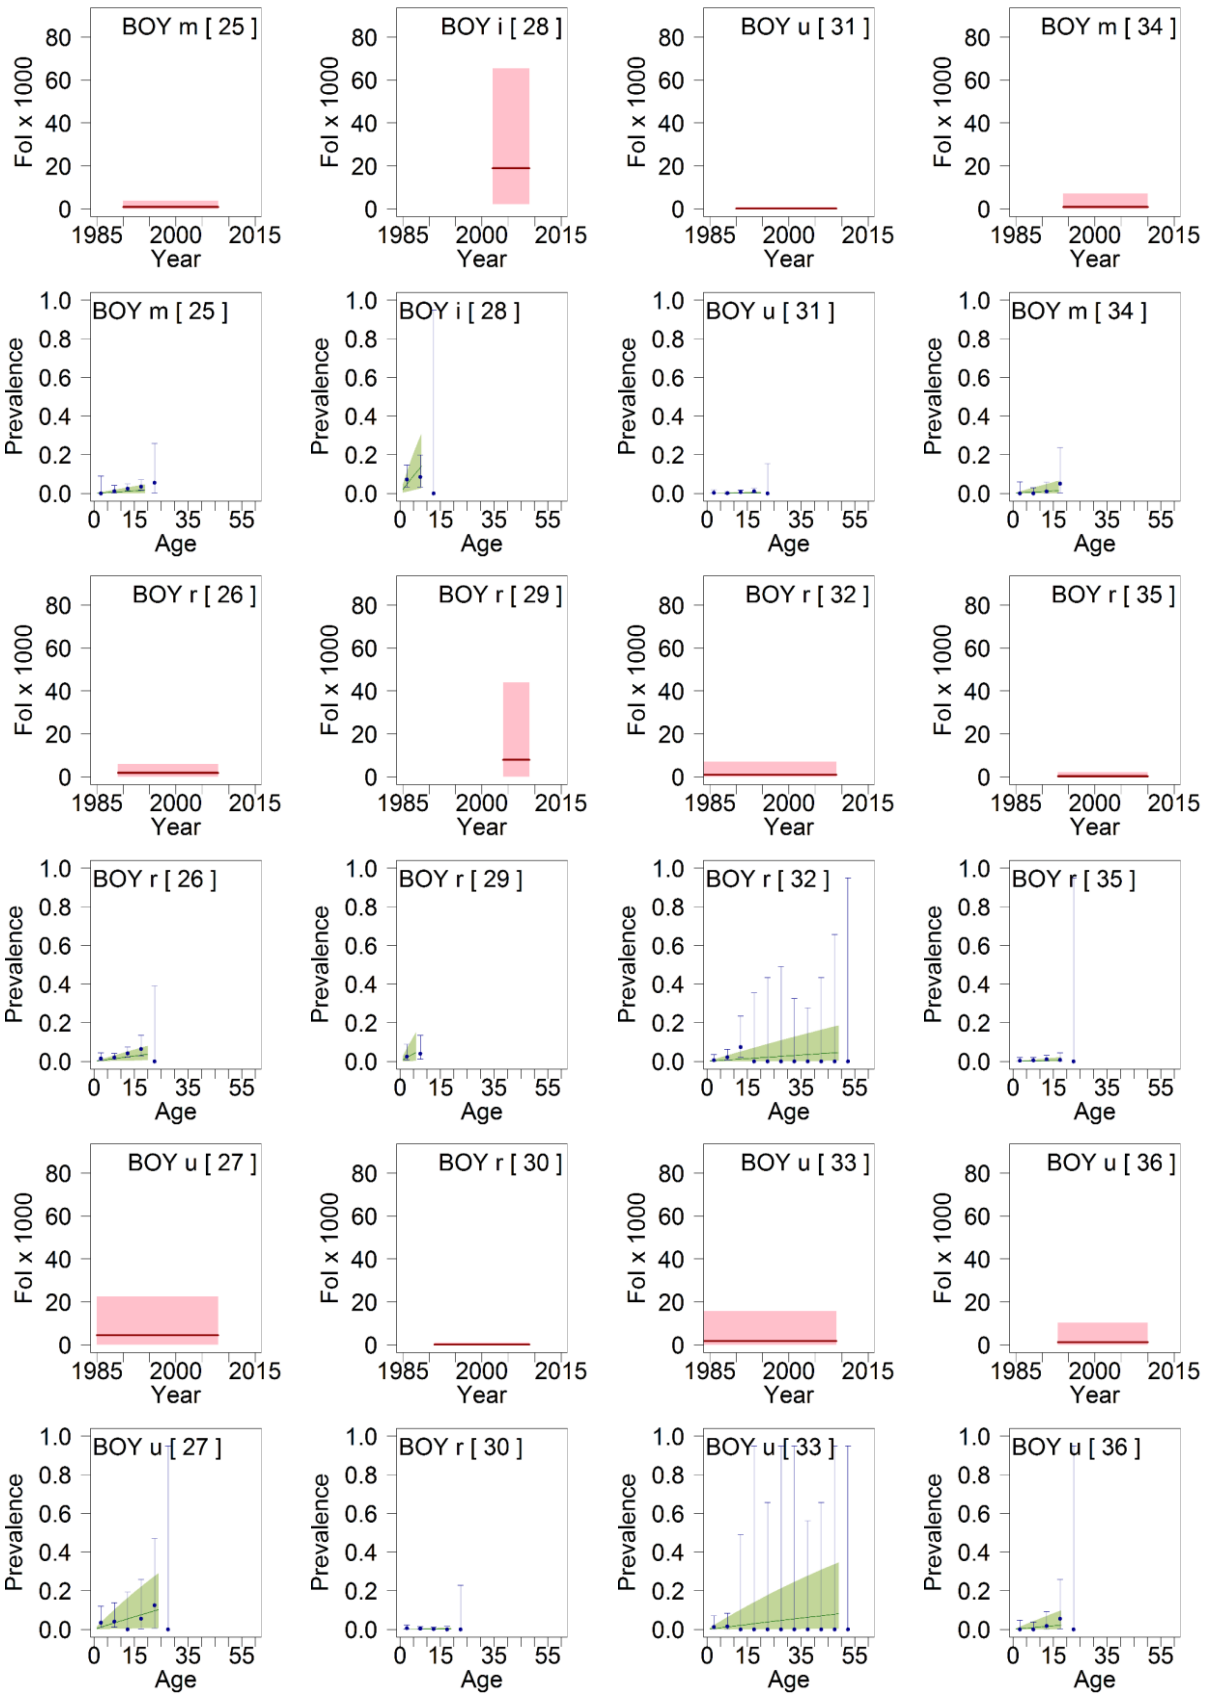

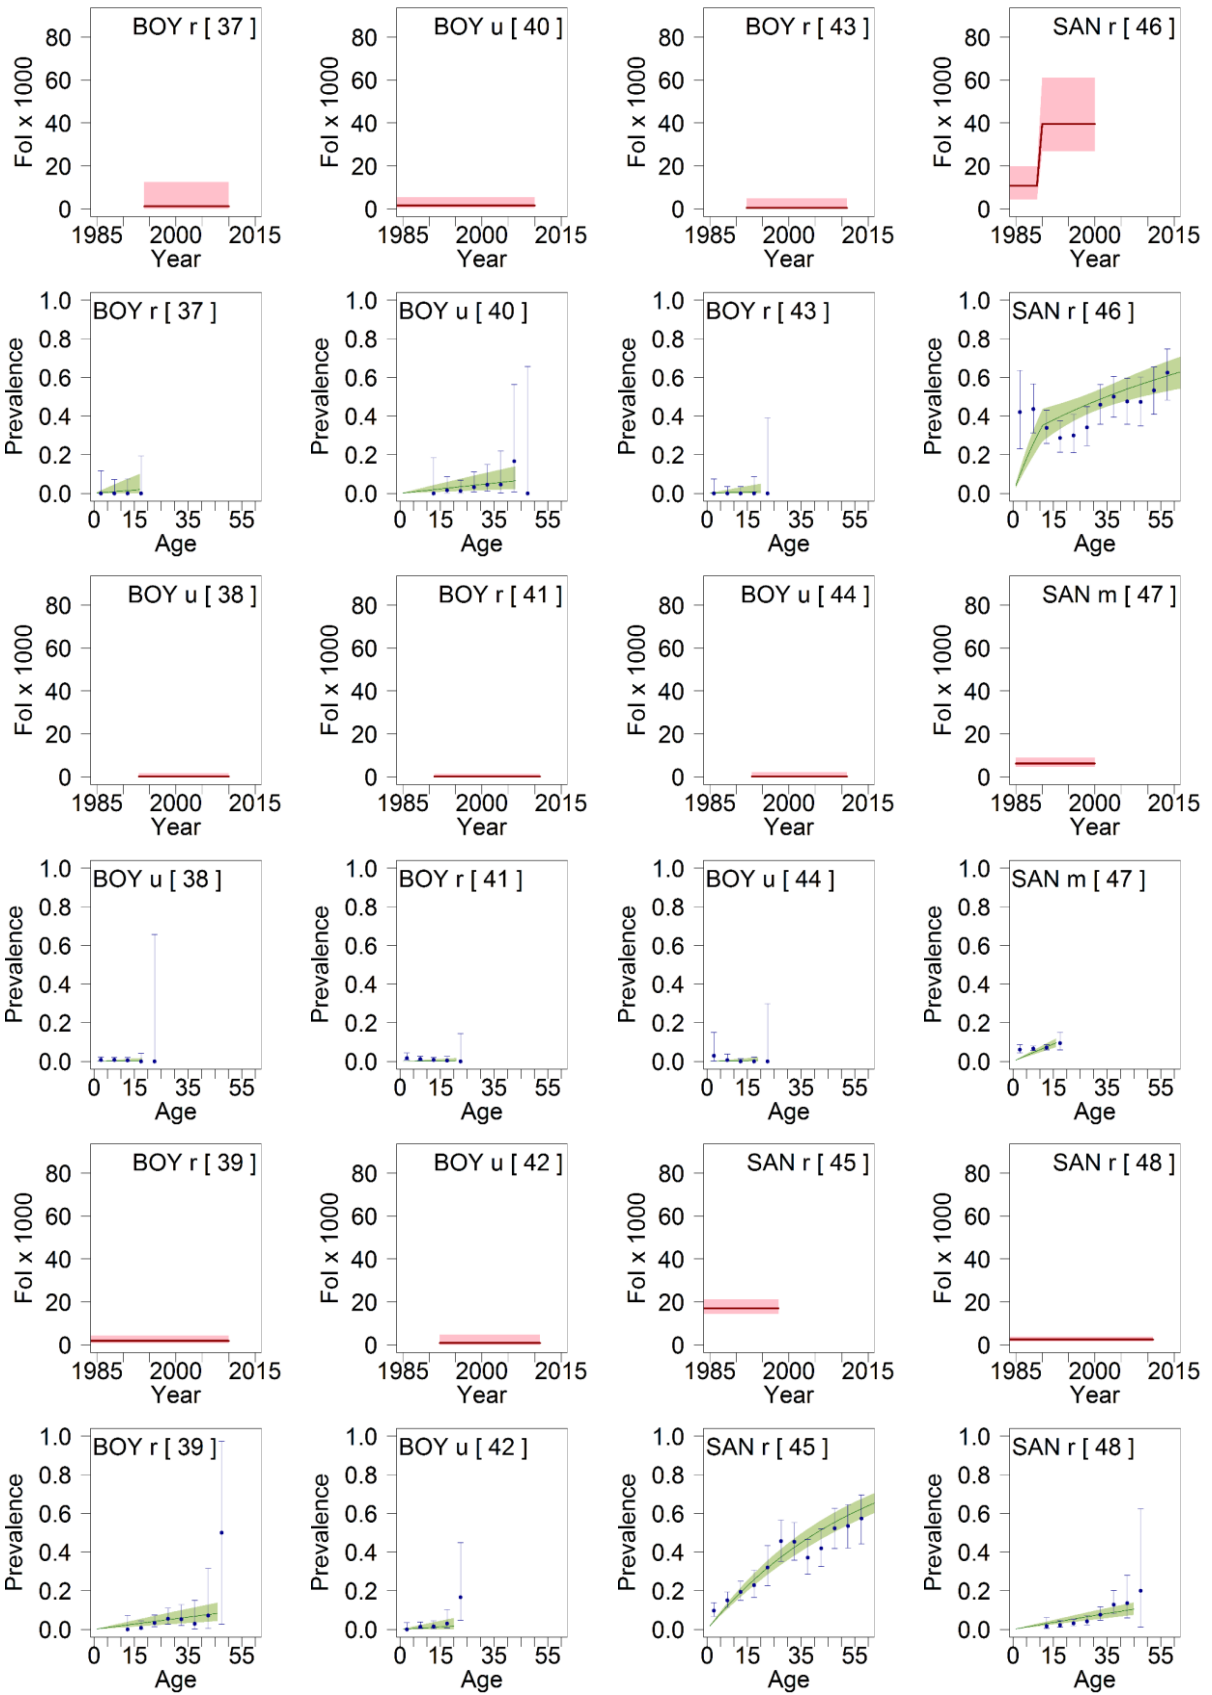

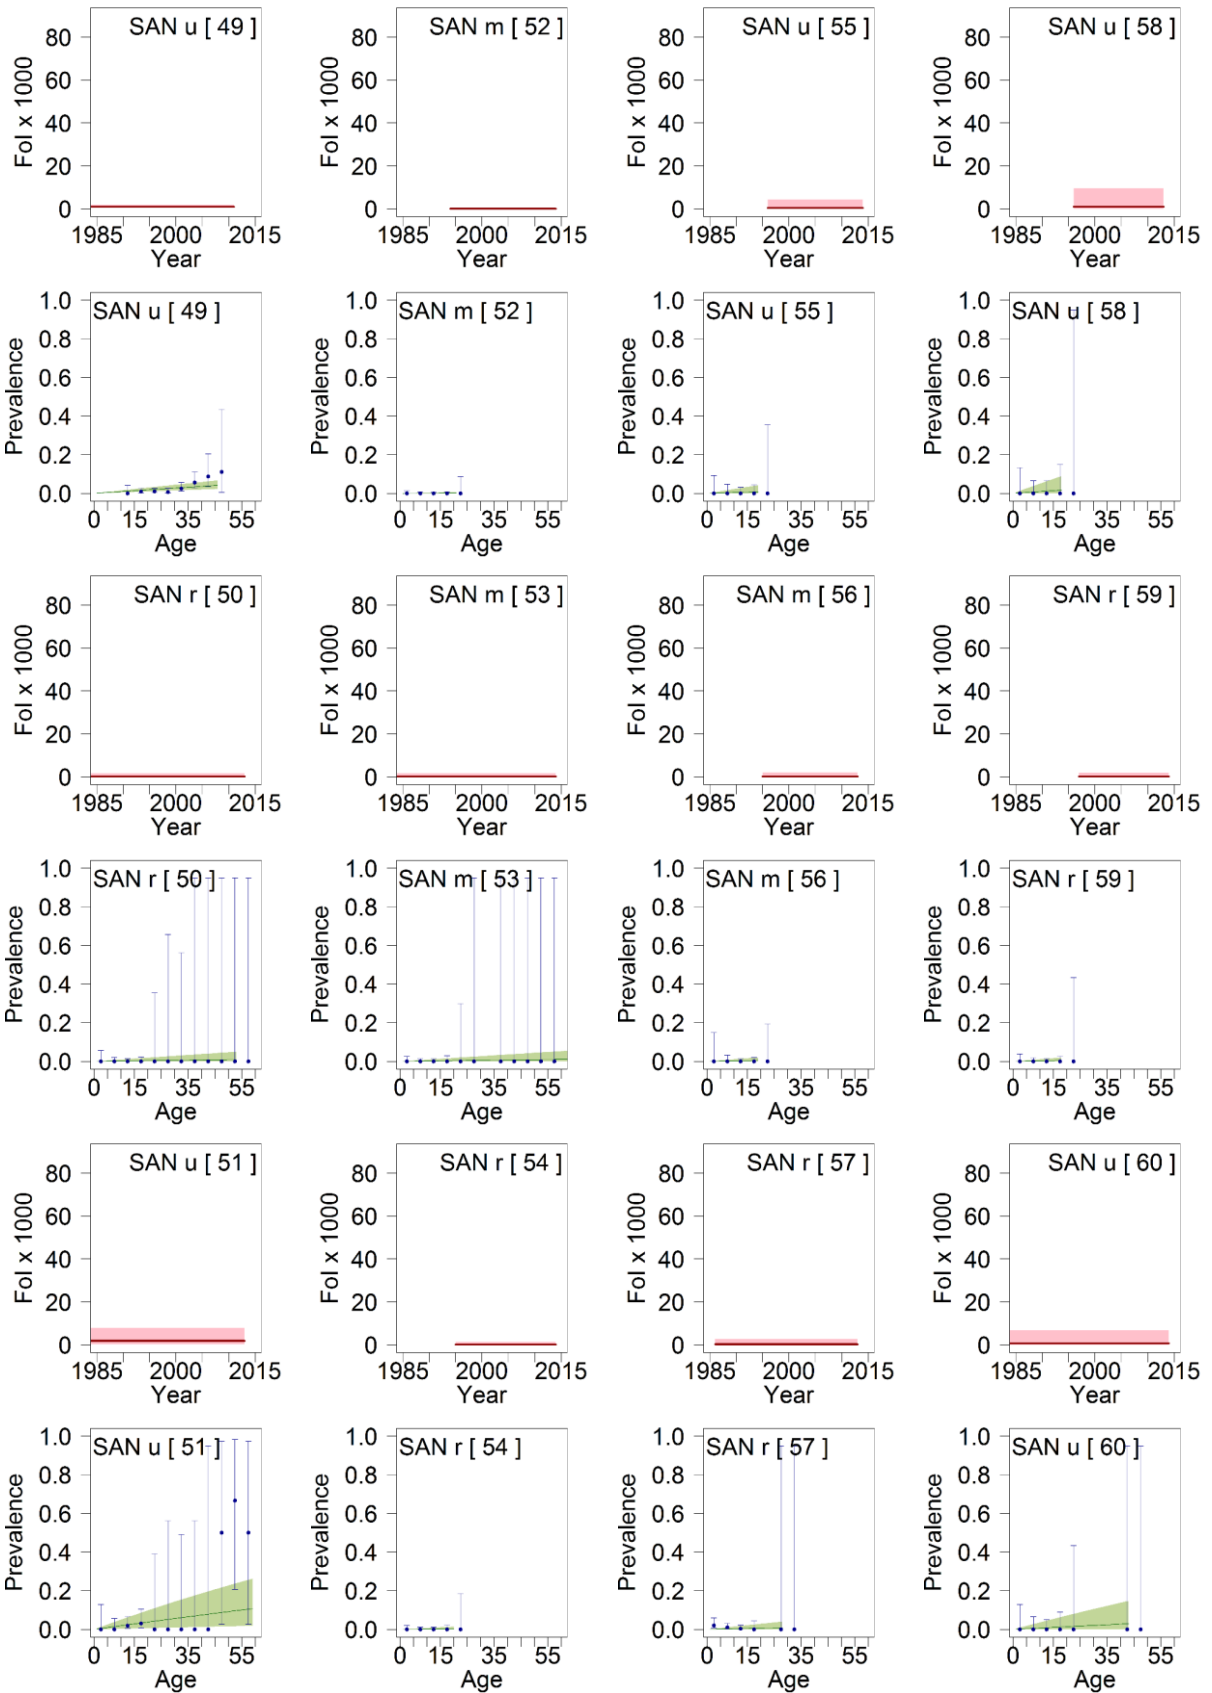

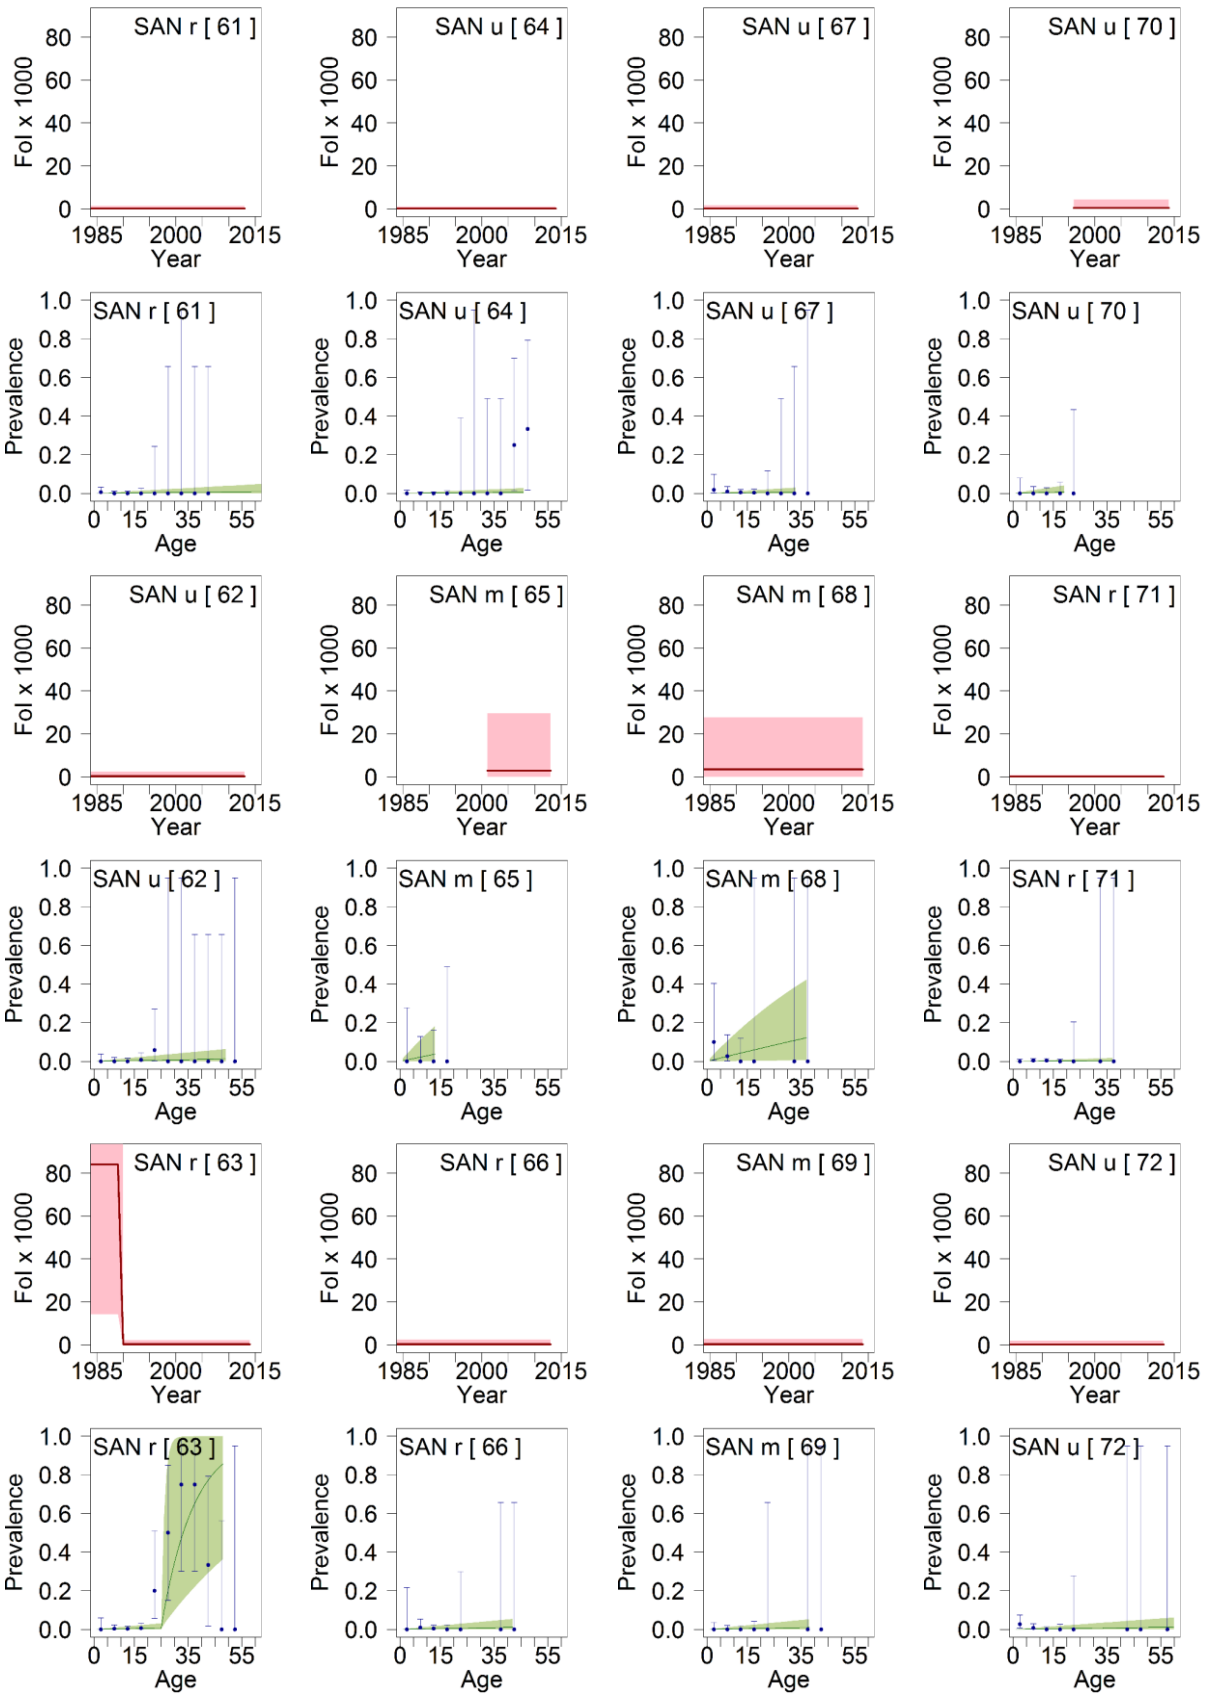

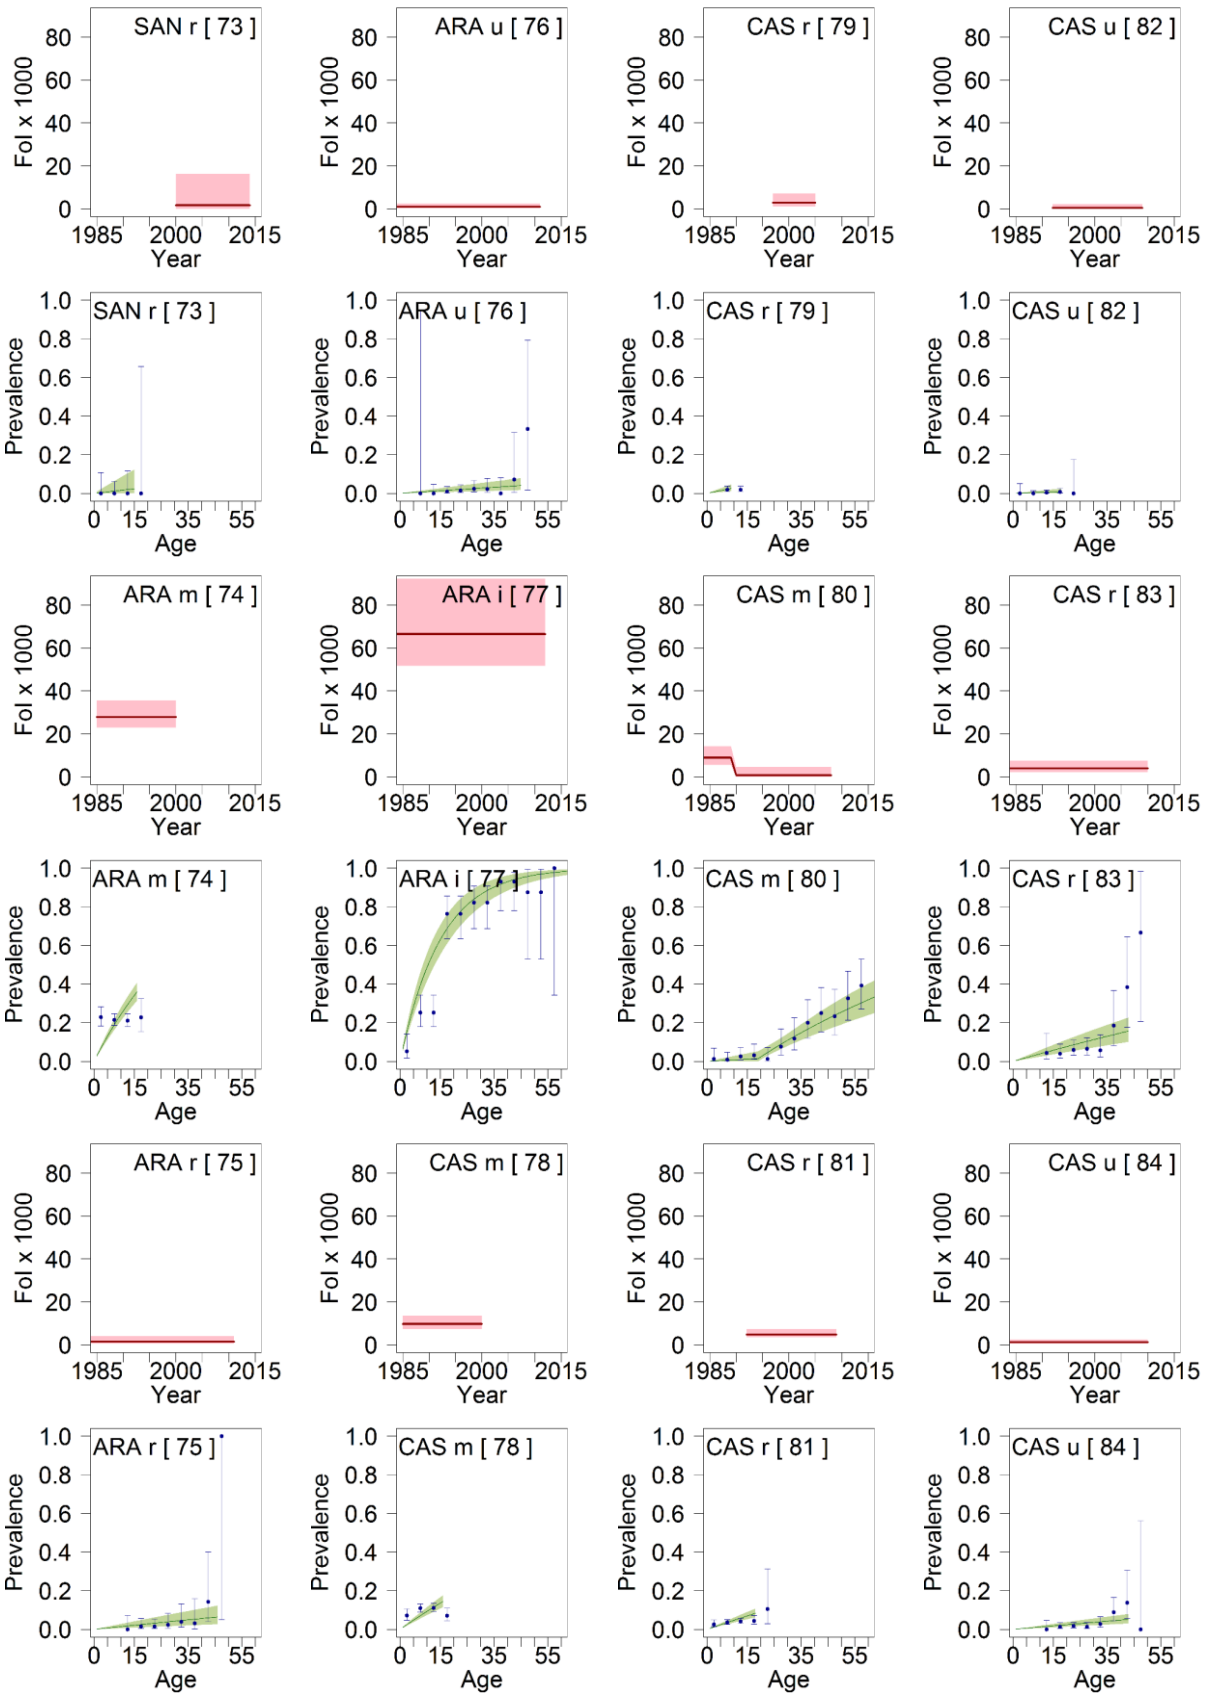

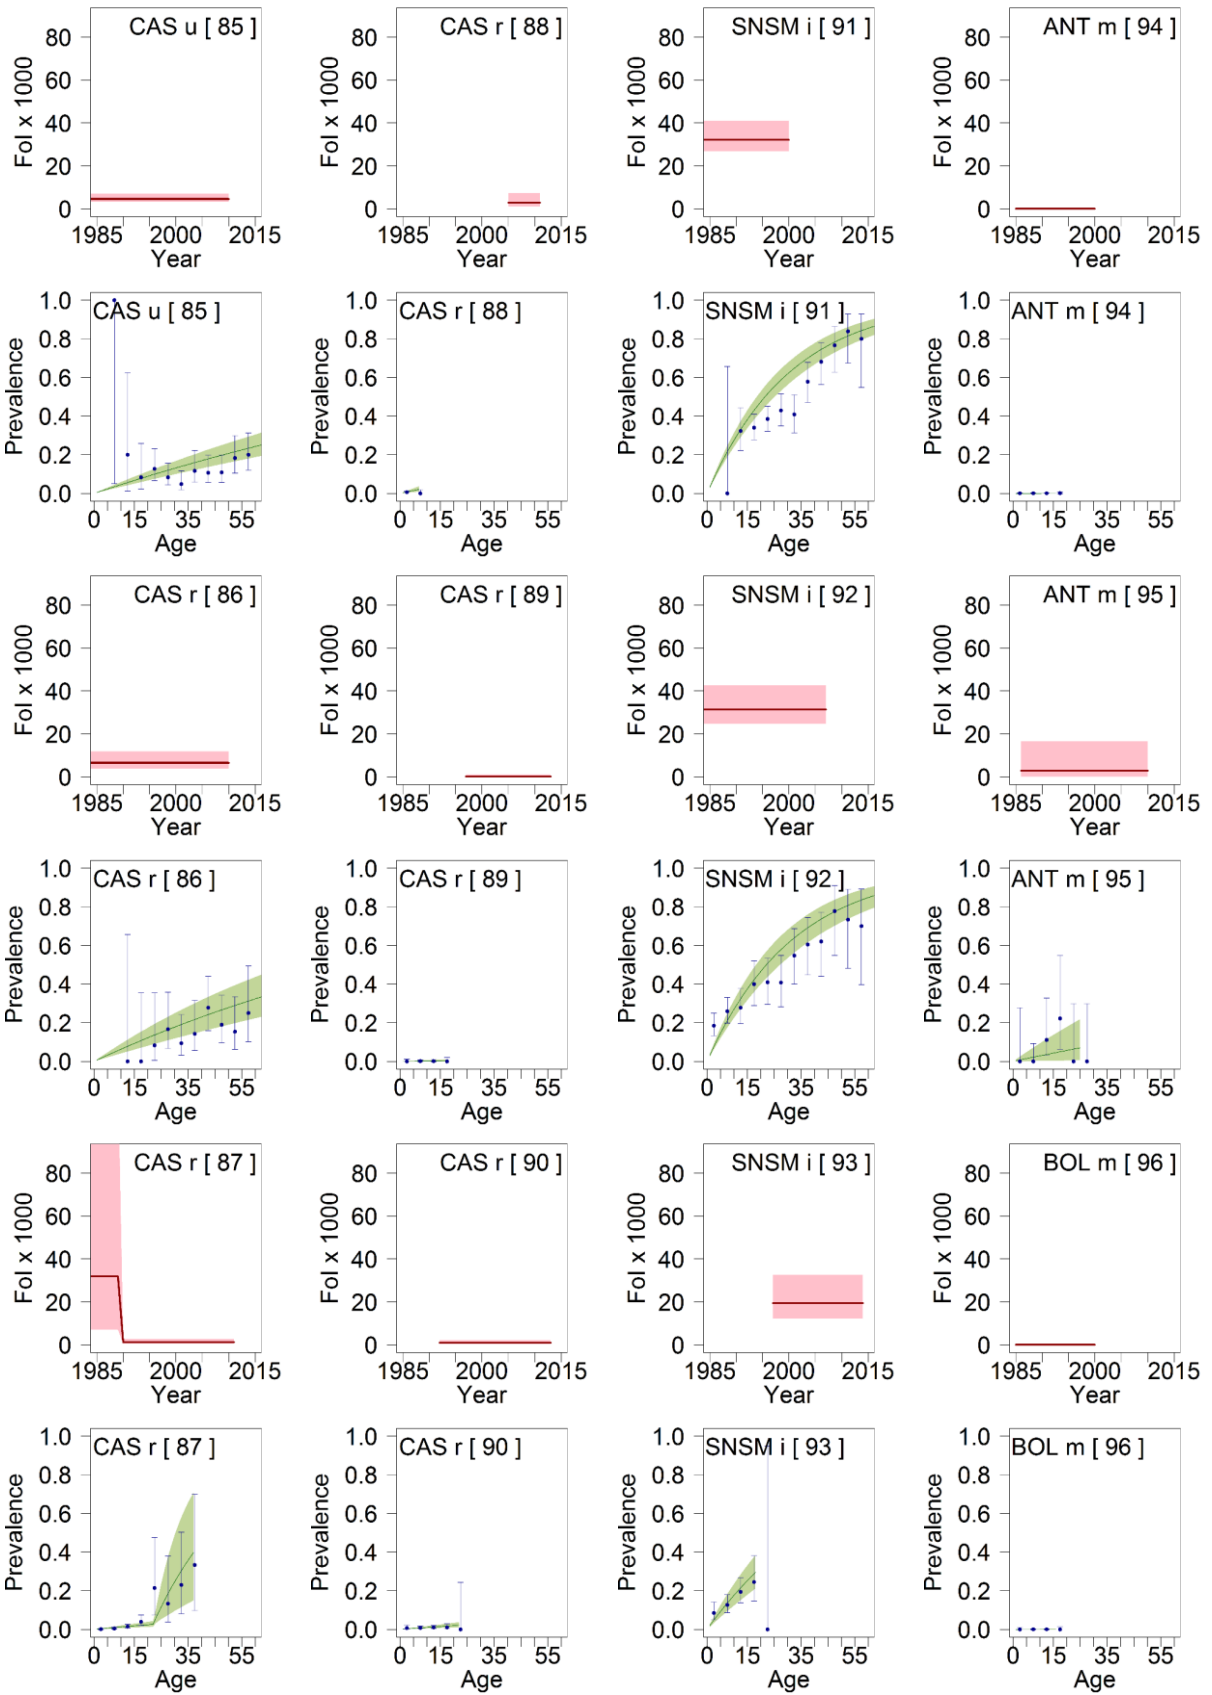

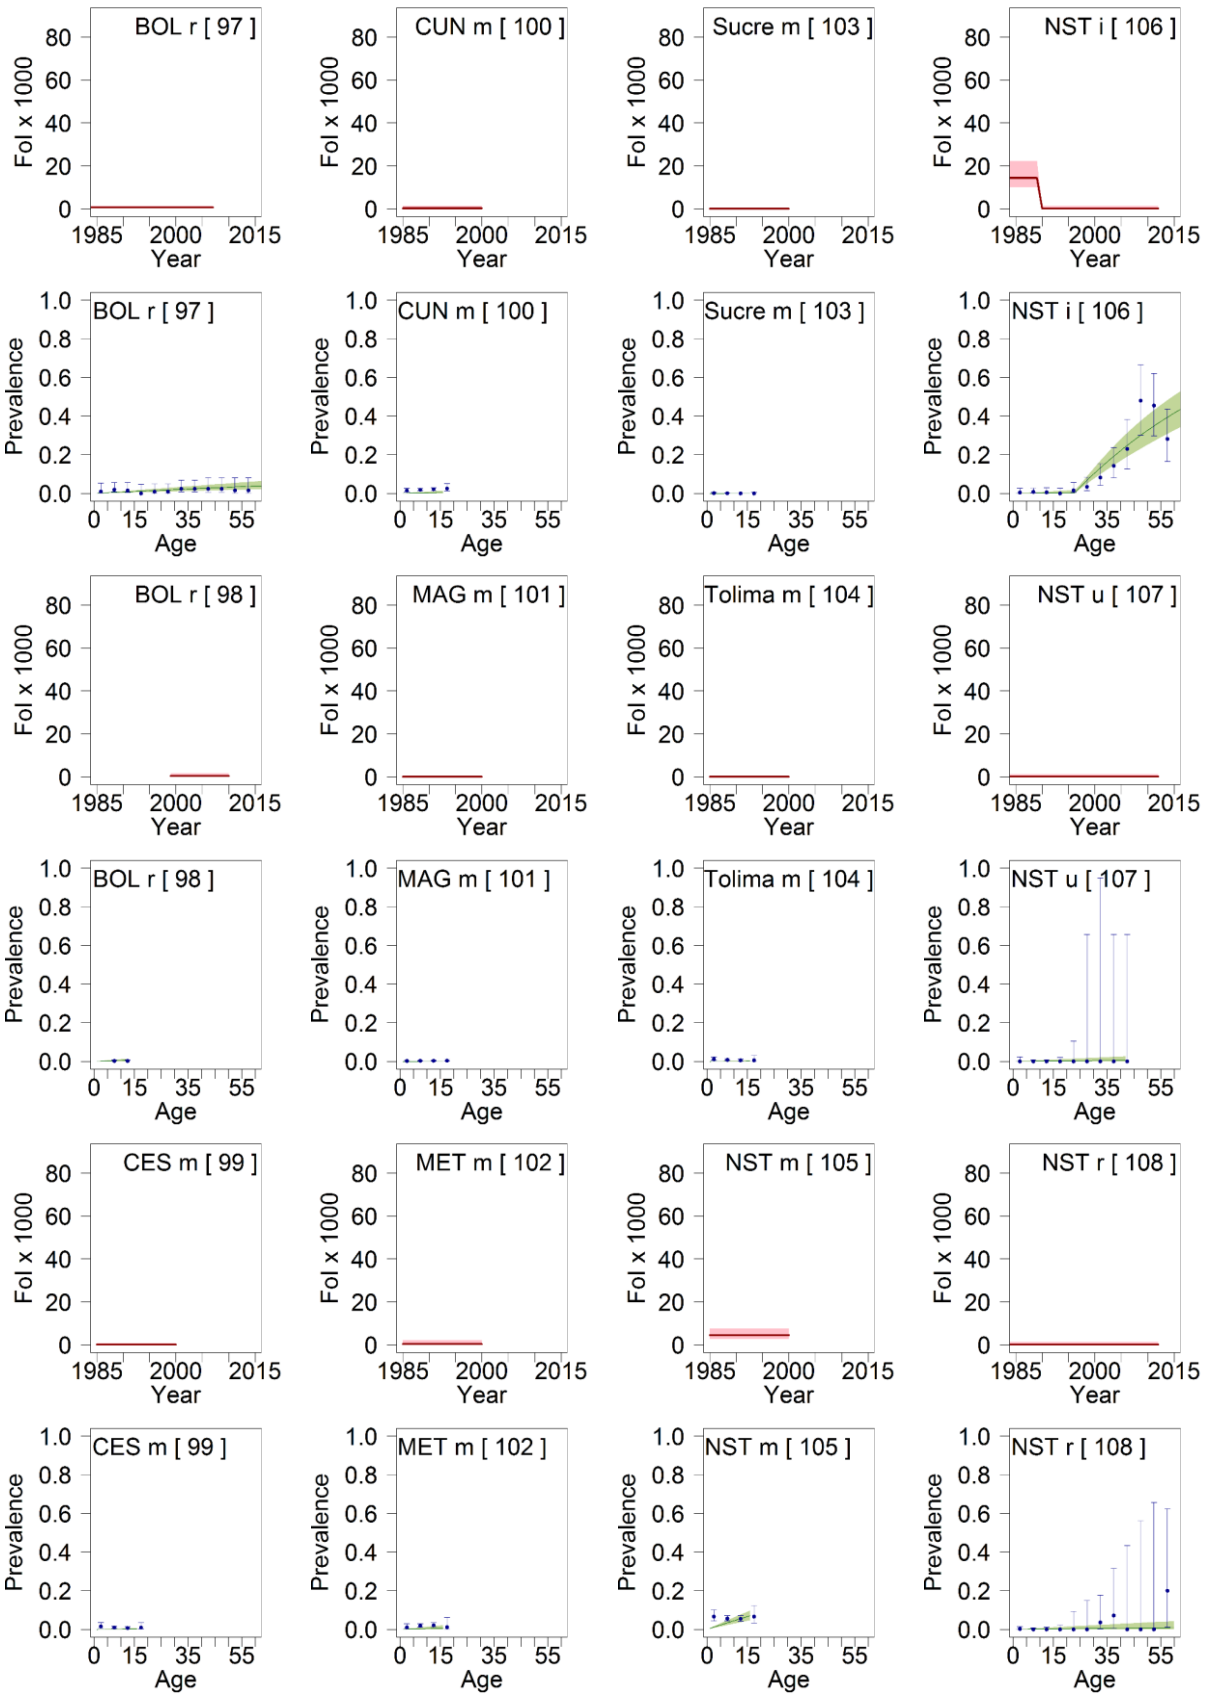



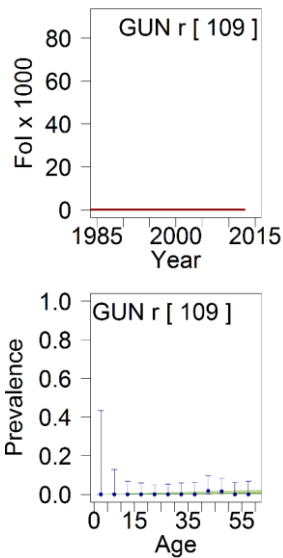

**Supplementary Figure 2. Paired (upper and lower) plots for 109 individual serosurveys of the force-of-infection (Fol) per 1,000 population at risk per year vs. year for the period 1984–2014 (upper) and age profiles of Chagas disease seroprevalence (lower) for the survey year** (See Supplementary Table 1). The red solid lines represent the median Fol and shaded pink areas the 95% Bayesian Credible Intervals (95% BCI) according to the best-fit models. Blue solid lines represent the median predicted prevalence and the green shaded areas the 95% BCI; solid circles represent observed prevalence values (plotted for the mid-point of each 10-year age range) and error bars are exact 95% CI. Abbreviations: BOY, Boyacá; SAN, Santander; CAS, Casanare; SNSM, Sierra Nevada de Santa Marta; ANT, Antioquia; BOL, Bolívar; CES, Cesar; CUN, Cundinamarca; MAG, Magdalena; MET, Meta; NST, Santander Norte; GUN, Guainía; i, indigeneous setting; r, rural setting; u, urban setting; m, mixed setting. Numbers in square brackets correspond to each serosurvey as cited in Supplementary Table 1.

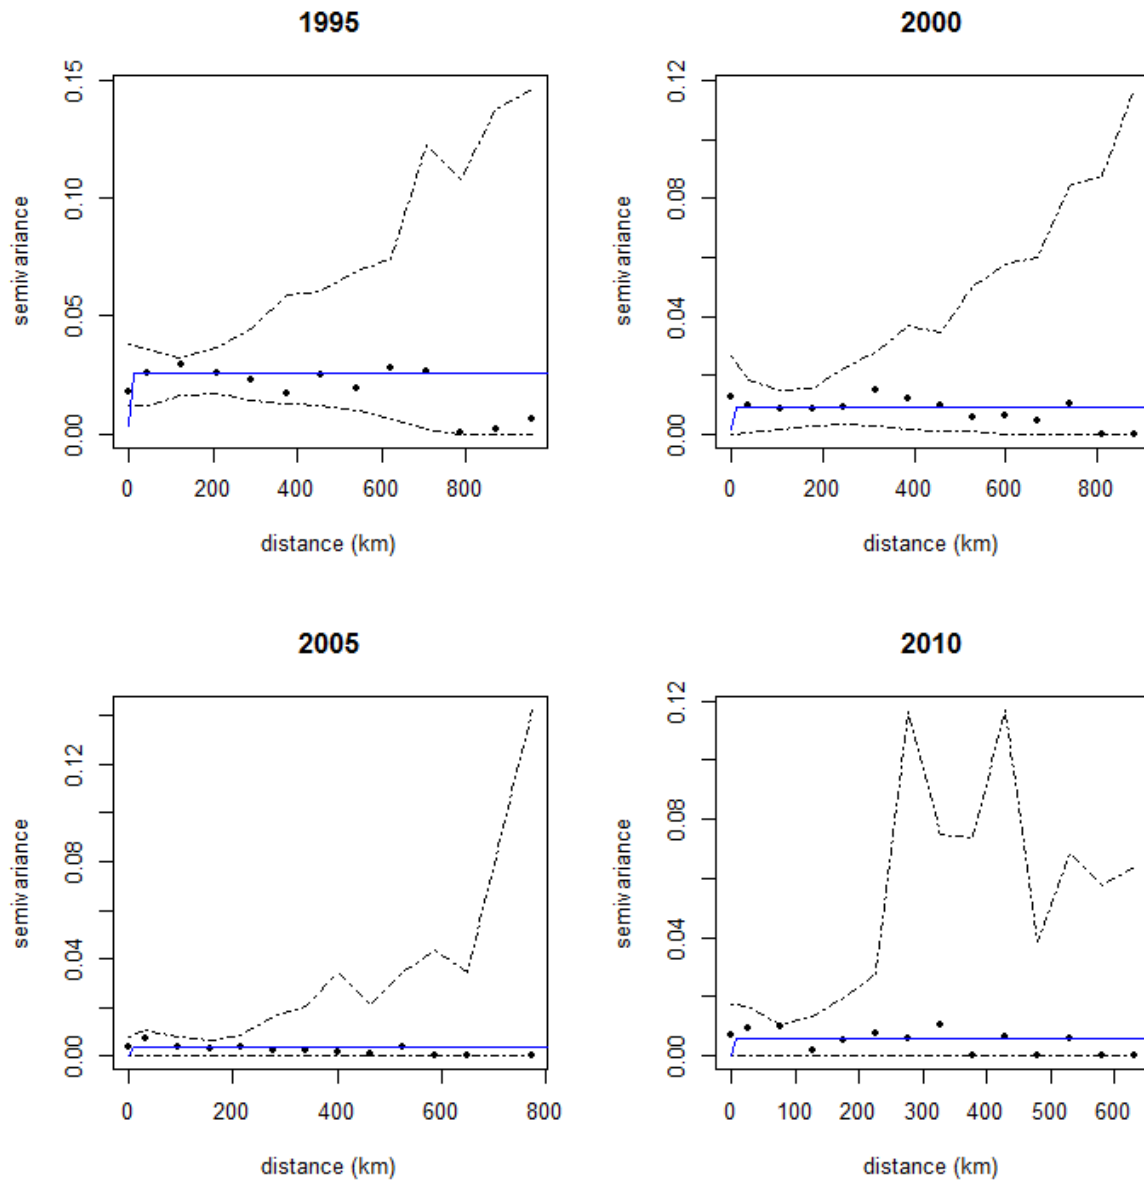

**Supplementary Figure 3. Semivariogram analysis of spatial trend in the Fol for the years 1995, 2000, 2005 and 2010.** The black circles represent the mean semivariance values between pairs of locations with a separation distance. The red solid line is the fitted theoretical variogram model illustrated with an exponential function. (Results were no different when other functions such as the Gaussian and spherical models were tested.) The dot-dashed lines represent the limits (95% non-parametric CI) of the envelope of variance expected by chance, obtained by randomly reassigning the values of force-of-infection at data locations. As the empirical semivariance fell within their envelopes we can accept the null hypothesis of non-spatial autocorrelation.

**Supplementary Table 1. Characteristics of the serosurveys included in the analyses**

| Survey number | Source [Reference]             | Type of source | Subnational level (first administrative level) | Year of survey | Test(s) used | Sample size | Observed overall prevalence | Type of setting | Age (years) |     |
|---------------|--------------------------------|----------------|------------------------------------------------|----------------|--------------|-------------|-----------------------------|-----------------|-------------|-----|
|               |                                |                |                                                |                |              |             |                             |                 | Min         | Max |
| 1             | Orozco Vargas et al., 1998 [7] | Paper          | Boyacá                                         | 1998           | ELISA        | 333         | 34%                         | rural           | 5           | 75  |
| 2             | Orozco Vargas et al., 1998 [7] | Paper          | Boyacá                                         | 1998           | ELISA        | 356         | 5%                          | urban           | 5           | 75  |
| 3             | Guhl et al. 2005 [9]           | Paper & Report | Boyacá                                         | 2000           | ELISA        | 2958        | 4%                          | mixed           | 2           | 16  |
| 4             | MoH, 2015 [12]                 | Report         | Boyacá                                         | 2007           | ELISA        | 274         | 2%                          | rural           | 4           | 16  |
| 5             | MoH, 2015 [12]                 | Report         | Boyacá                                         | 2007           | ELISA        | 277         | 1%                          | urban           | 5           | 16  |
| 6             | MoH, 2015 [12]                 | Report         | Boyacá                                         | 2007           | ELISA        | 803         | 3%                          | rural           | 3           | 15  |
| 7             | MoH., 2015 [12]                | Report         | Boyacá                                         | 2007           | ELISA        | 92          | 2%                          | urban           | 5           | 15  |
| 8             | MoH, 2015 [12]                 | Report         | Boyacá                                         | 2007           | ELISA        | 212         | 24%                         | indigenous      | 1           | 62  |
| 9             | MoH, 2015 [12]                 | Report         | Boyacá                                         | 2007           | ELISA        | 689         | 6%                          | rural           | 2           | 60  |
| 10            | MoH, 2015 [12]                 | Report         | Boyacá                                         | 2007           | ELISA        | 285         | 4%                          | urban           | 5           | 19  |
| 11            | MoH, 2015 [12]                 | Report         | Boyacá                                         | 2007           | ELISA        | 590         | 2%                          | rural           | 4           | 17  |
| 12            | MoH., 2015 [12]                | Report         | Boyacá                                         | 2007           | ELISA        | 205         | 2%                          | urban           | 5           | 15  |
| 13            | MoH, 2015 [12]                 | Report         | Boyacá                                         | 2007           | ELISA        | 124         | 1%                          | rural           | 4           | 15  |
| 14            | MoH, 2015 [12]                 | Report         | Boyacá                                         | 2007           | ELISA        | 140         | 1%                          | rural           | 5           | 12  |
| 15            | MoH, 2015 [12]                 | Report         | Boyacá                                         | 2007           | ELISA        | 166         | 4%                          | rural           | 2           | 14  |
| 16            | MoH, 2015 [12]                 | Report         | Boyacá                                         | 2007           | ELISA        | 84          | 2%                          | urban           | 3           | 14  |
| 17            | MoH, 2015 [12]                 | Report         | Boyacá                                         | 2007           | ELISA        | 508         | 1%                          | rural           | 5           | 15  |
| 18            | MoH, 2015 [12]                 | Report         | Boyacá                                         | 2007           | ELISA        | 50          | 0%                          | urban           | 5           | 15  |
| 19            | MoH, 2015 [12]                 | Report         | Boyacá                                         | 2008           | ELISA        | 323         | 2%                          | rural           | 2           | 17  |
| 20            | MoH, 2015 [12]                 | Report         | Boyacá                                         | 2008           | ELISA        | 392         | 4%                          | urban           | 4           | 23  |
| 21            | MoH, 2015 [12]                 | Report         | Boyacá                                         | 2008           | ELISA        | 484         | 2%                          | rural           | 3           | 54  |
| 22            | MoH, 2015 [12]                 | Report         | Boyacá                                         | 2008           | ELISA        | 364         | 1%                          | urban           | 4           | 45  |

|    |                                         |                              |           |      |                  |      |     |            |    |    |
|----|-----------------------------------------|------------------------------|-----------|------|------------------|------|-----|------------|----|----|
| 23 | MoH, 2015 [12]                          | Report                       | Boyacá    | 2008 | ELISA            | 121  | 1%  | rural      | 5  | 17 |
| 24 | MoH, 2015 [12]                          | Report                       | Boyacá    | 2008 | ELISA            | 1680 | 1%  | urban      | 5  | 20 |
| 25 | MoH, 2015 [12]                          | Report                       | Boyacá    | 2008 | ELISA            | 377  | 2%  | mixed      | 1  | 19 |
| 26 | MoH, 2015 [12]                          | Report                       | Boyacá    | 2008 | ELISA            | 467  | 3%  | rural      | 1  | 20 |
| 27 | MoH, 2015 [12]                          | Report                       | Boyacá    | 2008 | ELISA            | 81   | 4%  | urban      | 1  | 24 |
| 28 | MoH, 2015 [12]                          | Report                       | Boyacá    | 2009 | ELISA            | 85   | 7%  | indigenous | 1  | 8  |
| 29 | MoH, 2015 [12]                          | Report                       | Boyacá    | 2009 | ELISA            | 79   | 3%  | rural      | 1  | 6  |
| 30 | MoH, 2015 [12]                          | Report                       | Boyacá    | 2009 | ELISA            | 853  | 0%  | rural      | 1  | 19 |
| 31 | MoH, 2015 [12]                          | Report                       | Boyacá    | 2009 | ELISA            | 1035 | 1%  | urban      | 1  | 20 |
| 32 | MoH, 2015 [12]                          | Report                       | Boyacá    | 2009 | ELISA            | 200  | 2%  | rural      | 1  | 49 |
| 33 | MoH, 2015 [12]                          | Report                       | Boyacá    | 2009 | ELISA            | 87   | 1%  | urban      | 1  | 49 |
| 34 | MoH, 2015 [12]                          | Report                       | Boyacá    | 2010 | ELISA            | 154  | 1%  | mixed      | 1  | 17 |
| 35 | MoH, 2015 [12]                          | Report                       | Boyacá    | 2010 | ELISA            | 561  | 1%  | rural      | 1  | 18 |
| 36 | MoH, 2015 [12]                          | Report                       | Boyacá    | 2010 | ELISA            | 134  | 1%  | urban      | 1  | 18 |
| 37 | MoH, 2015 [12]                          | Report                       | Boyacá    | 2010 | ELISA            | 76   | 0%  | rural      | 1  | 17 |
| 38 | MoH, 2015 [12]                          | Report                       | Boyacá    | 2010 | ELISA            | 741  | 1%  | urban      | 1  | 18 |
| 39 | Cucunubá et al., 2012, 2013 [17,18]     | Abstract & Report            | Boyacá    | 2010 | ELISA, IFAT, HAI | 290  | 3%  | rural      | 14 | 46 |
| 40 | Cucunubá et al., 2012, 2013 [17,18]     | Abstract & Report            | Boyacá    | 2010 | ELISA, IFAT, HAI | 148  | 3%  | urban      | 14 | 43 |
| 41 | MoH, 2015 [12]                          | Report                       | Boyacá    | 2011 | ELISA            | 760  | 1%  | rural      | 1  | 21 |
| 42 | MoH, 2015 [12]                          | Report                       | Boyacá    | 2011 | ELISA            | 311  | 2%  | urban      | 1  | 20 |
| 43 | MoH, 2015 [12]                          | Report                       | Boyacá    | 2011 | ELISA            | 158  | 0%  | rural      | 1  | 20 |
| 44 | MoH, 2015 [12]                          | Report                       | Boyacá    | 2011 | ELISA            | 311  | 0%  | urban      | 1  | 19 |
| 45 | Angulo-Silva, 2001 [8]                  | CINTROP/ UIS Report          | Santander | 1998 | ELISA            | 926  | 29% | rural      | 1  | 98 |
| 46 | Angulo-Silva, 2001 [8]                  | Papers & CINTROP/ UIS Report | Santander | 2000 | ELISA            | 481  | 44% | rural      | 2  | 82 |
| 47 | Guhl et al., 2005 [9]                   | Paper & Report               | Santander | 2000 | ELISA            | 1802 | 7%  | mixed      | 3  | 16 |
| 48 | Castellanos-Dominguez et al., 2016 [23] | Paper                        | Santander | 2011 | ELISA, IFAT, HAI | 788  | 5%  | rural      | 14 | 45 |
| 49 | Castellanos-Dominguez et al., 2016 [23] | Paper                        | Santander | 2011 | ELISA, IFAT, HAI | 722  | 2%  | urban      | 13 | 46 |

|    |                                     |                   |           |      |                  |      |     |            |    |    |
|----|-------------------------------------|-------------------|-----------|------|------------------|------|-----|------------|----|----|
| 50 | MoH, 2015 [26]                      | Report            | Santander | 2013 | ELISA            | 354  | 0%  | rural      | 1  | 53 |
| 51 | MoH, 2015 [26]                      | Report            | Santander | 2013 | ELISA            | 146  | 3%  | urban      | 1  | 59 |
| 52 | MoH, 2015 [26]                      | Report            | Santander | 2014 | ELISA            | 1152 | 0%  | mixed      | 1  | 21 |
| 53 | MoH, 2015 [26]                      | Report            | Santander | 2014 | ELISA            | 454  | 0%  | mixed      | 1  | 67 |
| 54 | MoH, 2015 [26]                      | Report            | Santander | 2014 | ELISA            | 573  | 0%  | rural      | 1  | 20 |
| 55 | MoH, 2015 [26]                      | Report            | Santander | 2014 | ELISA            | 162  | 0%  | urban      | 2  | 19 |
| 56 | MoH, 2015 [26]                      | Report            | Santander | 2013 | ELISA            | 291  | 0%  | mixed      | 4  | 19 |
| 57 | MoH, 2015 [26]                      | Report            | Santander | 2013 | ELISA            | 390  | 1%  | rural      | 1  | 28 |
| 58 | MoH, 2015 [26]                      | Report            | Santander | 2013 | ELISA            | 80   | 0%  | urban      | 1  | 18 |
| 59 | MoH, 2015 [26]                      | Report            | Santander | 2014 | ELISA            | 351  | 0%  | rural      | 1  | 18 |
| 60 | MoH, 2015 [26]                      | Report            | Santander | 2014 | ELISA            | 103  | 0%  | urban      | 1  | 43 |
| 61 | MoH, 2015 [26]                      | Report            | Santander | 2013 | ELISA            | 523  | 0%  | rural      | 1  | 66 |
| 62 | MoH, 2015 [26]                      | Report            | Santander | 2013 | ELISA            | 330  | 0%  | urban      | 1  | 49 |
| 63 | MoH, 2015 [26]                      | Report            | Santander | 2014 | ELISA            | 428  | 2%  | rural      | 1  | 48 |
| 64 | MoH, 2015 [26]                      | Report            | Santander | 2014 | ELISA            | 775  | 0%  | urban      | 1  | 46 |
| 65 | MoH, 2015 [26]                      | Report            | Santander | 2013 | ELISA            | 30   | 0%  | mixed      | 4  | 13 |
| 66 | MoH, 2015 [26]                      | Report            | Santander | 2013 | ELISA            | 263  | 0%  | rural      | 1  | 42 |
| 67 | MoH, 2015 [26]                      | Report            | Santander | 2013 | ELISA            | 457  | 1%  | urban      | 1  | 33 |
| 68 | MoH, 2015 [26]                      | Report            | Santander | 2014 | ELISA            | 39   | 3%  | mixed      | 5  | 37 |
| 69 | MoH, 2015 [26]                      | Report            | Santander | 2014 | ELISA            | 306  | 0%  | mixed      | 1  | 38 |
| 70 | MoH, 2015 [26]                      | Report            | Santander | 2014 | ELISA            | 173  | 0%  | urban      | 2  | 19 |
| 71 | MoH, 2015 [26]                      | Report            | Santander | 2013 | ELISA            | 1014 | 0%  | rural      | 1  | 37 |
| 72 | Dib et al., 2011 [13]               | Report            | SNSM      | 2007 | ELISA            | 419  | 33% | indigenous | 1  | 81 |
| 73 | MoH, 2015 [26]                      | Report            | Santander | 2014 | ELISA            | 61   | 0%  | rural      | 5  | 15 |
| 74 | Guhl et al., 2005 [9]               | Paper & Report    | Arauca    | 2000 | ELISA            | 823  | 22% | mixed      | 2  | 16 |
| 75 | Cucunubá et al., 2012, 2013 [17,18] | Abstract & Report | Arauca    | 2011 | ELISA, IFAT, HAI | 243  | 2%  | rural      | 13 | 46 |
| 76 | Cucunubá et al., 2012, 2013 [17,18] | Abstract & Report | Arauca    | 2011 | ELISA, IFAT, HAI | 379  | 2%  | urban      | 12 | 45 |

|     |                                      |                    |              |      |                  |      |     |            |    |    |
|-----|--------------------------------------|--------------------|--------------|------|------------------|------|-----|------------|----|----|
| 77  | OPS/PAHO, 2012 [24]                  | Report             | Arauca       | 2012 | ELISA, IFAT, HAI | 304  | 49% | indigenous | 3  | 70 |
| 78  | Guhl et al., 2005 [9]                | Paper & Report     | Casanare     | 2000 | ELISA            | 1137 | 10% | mixed      | 1  | 16 |
| 79  | MoH, 2015 [11]                       | Report             | Casanare     | 2005 | ELISA, IFAT      | 411  | 2%  | rural      | 9  | 9  |
| 80  | Angulo-Silva, 2012 [15]              | Report CINTROP/UIS | Casanare     | 2008 | ELISA            | 492  | 12% | mixed      | 1  | 88 |
| 81  | Bianchi et al., 2015 [16]            | Paper              | Casanare     | 2009 | ELISA, IFAT, HAI | 1338 | 4%  | rural      | 5  | 18 |
| 82  | Bianchi et al., 2015 [16]            | Paper              | Casanare     | 2009 | ELISA, IFAT, HAI | 528  | 0%  | urban      | 5  | 18 |
| 83  | Cucunubá et al., 2012 [18,19]        | Paper              | Casanare     | 2010 | ELISA, IFAT, HAI | 280  | 7%  | rural      | 13 | 43 |
| 84  | Cucunubá et al., 2012 [18,19]        | Paper              | Casanare     | 2010 | ELISA, IFAT, HAI | 682  | 2%  | urban      | 13 | 43 |
| 85  | Gutierrez et al., 2013 [20]          | Paper              | Casanare     | 2010 | ELISA, HAI       | 360  | 14% | urban      | 15 | 89 |
| 86  | Gutierrez et al., 2013 [20]          | Paper              | Casanare     | 2010 | ELISA, HAI       | 126  | 19% | rural      | 13 | 81 |
| 87  | MoH, 2015 [11]                       | Report             | Casanare     | 2011 | ELISA, IFAT      | 1597 | 1%  | rural      | 2  | 37 |
| 88  | MoH, 2015 [11]                       | Report             | Casanare     | 2011 | ELISA, IFAT      | 1400 | 1%  | rural      | 2  | 7  |
| 89  | MoH, 2015 [11]                       | Report             | Casanare     | 2013 | ELISA, IFAT      | 926  | 0%  | rural      | 2  | 17 |
| 90  | MoH, 2015 [11]                       | Report             | Casanare     | 2013 | ELISA, IFAT      | 1215 | 1%  | rural      | 2  | 22 |
| 91  | Parra et al., 2004 [10]              | Paper & Report     | SNSM         | 2000 | ELISA, IFAT      | 493  | 47% | indigenous | 10 | 80 |
| 92  | MoH, 2015 [26]                       | Report             | Santander    | 2013 | ELISA            | 419  | 1%  | urban      | 1  | 60 |
| 93  | Valencia-Hernández et al., 2015 [28] | Abstract & Report  | SNSM         | 2014 | ELISA or RDT     | 287  | 14% | indigenous | 1  | 16 |
| 94  | Guhl et al., 2005 [9]                | Paper & Report     | Antioquia    | 2000 | ELISA            | 9800 | 0%  | mixed      | 1  | 16 |
| 95  | MoH, 2015 [21]                       | Report             | Antioquia    | 2010 | ELISA            | 66   | 6%  | mixed      | 1  | 67 |
| 96  | Guhl et al., 2005 [9]                | Paper & Report     | Bolivar      | 2000 | ELISA            | 2253 | 0%  | mixed      | 3  | 16 |
| 97  | Cantillo-Barraza et al., 2014 [14]   | Paper              | Bolivar      | 2007 | ELISA, IFAT      | 743  | 2%  | rural      | 5  | 75 |
| 98  | Cantillo-Barraza et al., 2015 [22]   | Paper              | Bolívar      | 2010 | ELISA, IFAT      | 803  | 0%  | rural      | 8  | 12 |
| 99  | Guhl et al., 2005 [9]                | Paper & Report     | Cesar        | 2000 | ELISA            | 1539 | 1%  | mixed      | 1  | 16 |
| 100 | Guhl et al., 2005 [9]                | Paper & Report     | Cundinamarca | 2000 | ELISA            | 2583 | 2%  | mixed      | 1  | 16 |
| 101 | Guhl et al., 2005 [9]                | Paper & Report     | Magdalena    | 2000 | ELISA            | 7574 | 0%  | mixed      | 1  | 16 |
| 102 | Guhl et al., 2005 [9]                | Paper & Report     | Meta         | 2000 | ELISA            | 1006 | 2%  | mixed      | 2  | 16 |
| 103 | Guhl et al., 2005 [9]                | Paper & Report     | Sucre        | 2000 | ELISA            | 6040 | 0%  | mixed      | 1  | 16 |

|     |                       |                |                 |      |       |      |    |            |   |    |
|-----|-----------------------|----------------|-----------------|------|-------|------|----|------------|---|----|
| 104 | Guhl et al., 2005 [9] | Paper & Report | Tolima          | 2000 | ELISA | 2029 | 1% | mixed      | 2 | 16 |
| 105 | Guhl et al., 2005 [9] | Paper & Report | Santander Norte | 2000 | ELISA | 1188 | 6% | mixed      | 2 | 16 |
| 106 | MSF, 2013 [25]        | Report         | Santander Norte | 2012 | ELISA | 752  | 8% | indigenous | 1 | 92 |
| 107 | MSF, 2013 [25]        | Report         | Santander Norte | 2012 | ELISA | 642  | 0% | urban      | 1 | 42 |
| 108 | MSF, 2013 [25]        | Report         | Santander Norte | 2012 | ELISA | 858  | 0% | rural      | 1 | 60 |
| 109 | MoH, 2015 [27]        | Report         | Guainía         | 2013 | ELISA | 365  | 1% | rural      | 1 | 95 |

Abbreviations: MoH, Ministry of Health; MSF, Médicos Sin Fronteras; CINTROP/UIS, Centro de Investigación en Enfermedades Tropicales, Universidad Industrial de Santander; OPS/PAHO, Organización Panamericana de la Salud/Pan American Health Organization; SNSM, Sierra Nevada de Santa Marta; ELISA, enzyme-linked immunosorbent assay; IFAT, immunofluorescence antibody test; HAI, hemagglutination inhibition assay; RDT, Rapid Diagnostic Test.

**Supplementary Table 2. Deviance Information Criterion for selecting the best model fit for the force-of-infection of Chagas disease in Colombia in individual serosurveys**

| Survey number | DIC values             |                                                                                                  |    |    |    |    |                          | Best model |    | Fol per 1,000 at risk population per year |       |        |         |
|---------------|------------------------|--------------------------------------------------------------------------------------------------|----|----|----|----|--------------------------|------------|----|-------------------------------------------|-------|--------|---------|
|               | Constant Fol (Model 1) | Model with up to four discrete changes in Fol over time and five values of $\lambda_i$ (Model 2) |    |    |    |    | Yearly changes (Model 3) |            |    | Model                                     | DIC   | Median | 95% BCI |
|               |                        | 1                                                                                                | 2  | 3  | 4  | 5  |                          | -          | -  |                                           |       |        | -       |
| 1             | 46                     | 48                                                                                               | 49 | 49 | 50 | 51 | 202                      | 1          | 46 | 16.73                                     | 12.94 | -      | 22.63   |
| 2             | 37                     | 36                                                                                               | 38 | 41 | 43 | 45 | 212                      | 1          | 37 | 1.78                                      | 0.77  | -      | 3.91    |
| 3             | 72                     | 73                                                                                               | 71 | 71 | 71 | 72 | 85                       | 1          | 72 | 2.16                                      | 1.26  | -      | 3.56    |
| 4             | 19                     | 19                                                                                               | 21 | 23 | 25 | 27 | 51                       | 1          | 19 | 0.90                                      | 0.01  | -      | 5.54    |
| 5             | 17                     | 17                                                                                               | 19 | 22 | 24 | 26 | 51                       | 1          | 17 | 0.53                                      | 0.01  | -      | 3.89    |
| 6             | 44                     | 44                                                                                               | 44 | 45 | 46 | 48 | 65                       | 1          | 44 | 1.15                                      | 0.05  | -      | 3.86    |
| 7             | 11                     | 11                                                                                               | 13 | 15 | 17 | 20 | 44                       | 1          | 11 | 1.63                                      | 0.03  | -      | 11.94   |
| 8             | 61                     | 58                                                                                               | 59 | 60 | 61 | 62 | 69                       | 1          | 61 | 31.30                                     | 21.49 | -      | 47.99   |
| 9             | 57                     | 59                                                                                               | 58 | 60 | 61 | 62 | 102                      | 1          | 57 | 3.77                                      | 1.83  | -      | 7.34    |
| 10            | 34                     | 35                                                                                               | 36 | 37 | 38 | 40 | 65                       | 1          | 34 | 2.10                                      | 0.14  | -      | 7.37    |
| 11            | 31                     | 31                                                                                               | 32 | 34 | 36 | 38 | 62                       | 1          | 31 | 0.59                                      | 0.01  | -      | 3.28    |
| 12            | 12                     | 12                                                                                               | 14 | 16 | 18 | 21 | 44                       | 1          | 12 | 1.05                                      | 0.02  | -      | 6.71    |
| 13            | 11                     | 11                                                                                               | 13 | 15 | 17 | 19 | 41                       | 1          | 11 | 1.01                                      | 0.02  | -      | 8.90    |
| 14            | 8                      | 8                                                                                                | 10 | 12 | 14 | 17 | 31                       | 1          | 8  | 0.98                                      | 0.01  | -      | 8.65    |
| 15            | 20                     | 20                                                                                               | 20 | 21 | 22 | 24 | 41                       | 1          | 20 | 3.26                                      | 0.20  | -      | 12.97   |
| 16            | 9                      | 9                                                                                                | 11 | 13 | 15 | 17 | 38                       | 1          | 9  | 2.00                                      | 0.02  | -      | 13.28   |
| 17            | 22                     | 22                                                                                               | 24 | 27 | 29 | 31 | 55                       | 1          | 22 | 0.26                                      | 0.00  | -      | 2.17    |
| 18            | 3                      | 3                                                                                                | 6  | 9  | 11 | 14 | 41                       | 1          | 3  | 1.48                                      | 0.02  | -      | 14.74   |
| 19            | 23                     | 23                                                                                               | 24 | 25 | 27 | 29 | 55                       | 1          | 23 | 1.43                                      | 0.04  | -      | 6.55    |
| 20            | 38                     | 40                                                                                               | 41 | 42 | 44 | 45 | 76                       | 1          | 38 | 1.40                                      | 0.12  | -      | 4.78    |
| 21            | 28                     | 30                                                                                               | 32 | 35 | 37 | 39 | 147                      | 1          | 28 | 0.38                                      | 0.01  | -      | 2.88    |
| 22            | 20                     | 23                                                                                               | 25 | 28 | 30 | 32 | 84                       | 1          | 20 | 0.33                                      | 0.01  | -      | 2.73    |
| 23            | 9                      | 9                                                                                                | 11 | 13 | 16 | 18 | 45                       | 1          | 9  | 1.04                                      | 0.02  | -      | 8.49    |
| 24            | 55                     | 56                                                                                               | 58 | 60 | 63 | 64 | 94                       | 1          | 55 | 0.11                                      | 0.00  | -      | 0.91    |
| 25            | 30                     | 30                                                                                               | 30 | 32 | 34 | 35 | 63                       | 1          | 30 | 0.84                                      | 0.03  | -      | 3.78    |
| 26            | 42                     | 43                                                                                               | 42 | 43 | 44 | 46 | 72                       | 1          | 42 | 1.86                                      | 0.14  | -      | 6.05    |
| 27            | 15                     | 18                                                                                               | 20 | 22 | 24 | 26 | 62                       | 1          | 15 | 4.49                                      | 0.13  | -      | 22.53   |
| 28            | 18                     | 18                                                                                               | 20 | 21 | 23 | 25 | 29                       | 1          | 18 | 18.97                                     | 2.07  | -      | 65.52   |
| 29            | 10                     | 10                                                                                               | 11 | 13 | 14 | 14 | 18                       | 1          | 10 | 7.96                                      | 0.13  | -      | 44.10   |
| 30            | 36                     | 36                                                                                               | 38 | 41 | 44 | 46 | 81                       | 1          | 36 | 0.11                                      | 0.00  | -      | 1.07    |
| 31            | 40                     | 40                                                                                               | 42 | 45 | 47 | 50 | 85                       | 1          | 40 | 0.11                                      | 0.00  | -      | 0.96    |
| 32            | 18                     | 21                                                                                               | 23 | 26 | 27 | 30 | 131                      | 1          | 18 | 0.96                                      | 0.02  | -      | 7.05    |
| 33            | 7                      | 10                                                                                               | 13 | 16 | 19 | 24 | 57                       | 1          | 7  | 1.72                                      | 0.02  | -      | 15.77   |
| 34            | 12                     | 12                                                                                               | 14 | 16 | 17 | 20 | 48                       | 1          | 12 | 0.88                                      | 0.02  | -      | 7.22    |
| 35            | 29                     | 29                                                                                               | 31 | 33 | 36 | 38 | 69                       | 1          | 29 | 0.25                                      | 0.00  | -      | 2.29    |
| 36            | 11                     | 11                                                                                               | 13 | 15 | 17 | 19 | 50                       | 1          | 11 | 1.23                                      | 0.03  | -      | 10.28   |



|    |     |     |     |     |     |     |     |                |     |       |       |   |       |
|----|-----|-----|-----|-----|-----|-----|-----|----------------|-----|-------|-------|---|-------|
| 37 | 4   | 4   | 7   | 10  | 12  | 15  | 45  | 1              | 4   | 1.14  | 0.02  | - | 12.47 |
| 38 | 33  | 33  | 35  | 38  | 40  | 43  | 73  | 1              | 33  | 0.20  | 0.00  | - | 1.75  |
| 39 | 42  | 41  | 42  | 43  | 45  | 46  | 122 | 1              | 42  | 0.20  | 0.00  | - | 1.75  |
| 40 | 26  | 26  | 27  | 29  | 31  | 32  | 118 | 1              | 26  | 1.56  | 0.43  | - | 5.43  |
| 41 | 42  | 42  | 44  | 46  | 49  | 51  | 88  | 1              | 42  | 0.16  | 0.00  | - | 1.45  |
| 42 | 26  | 26  | 27  | 29  | 30  | 32  | 65  | 1              | 26  | 0.84  | 0.02  | - | 4.79  |
| 43 | 8   | 8   | 10  | 13  | 16  | 18  | 56  | 1              | 8   | 0.48  | 0.01  | - | 4.80  |
| 44 | 18  | 18  | 20  | 23  | 25  | 28  | 65  | 1              | 18  | 0.21  | 0.00  | - | 2.09  |
| 45 | 279 | 277 | 278 | 279 | 279 | 279 | 406 | 1              | 279 | 17.01 | 14.37 | - | 21.13 |
| 46 | 248 | 236 | 234 | 234 | 233 | 234 | 349 | 2 <sup>b</sup> | 236 | 10.80 | 4.28  | - | 19.78 |
| 47 | 65  | 66  | 66  | 67  | 67  | 67  | 71  | 1              | 65  | 6.24  | 4.57  | - | 8.86  |
| 48 | 87  | 83  | 84  | 84  | 85  | 86  | 135 | 1              | 87  | 2.45  | 1.62  | - | 3.89  |
| 49 | 58  | 57  | 57  | 58  | 60  | 61  | 127 | 1              | 58  | 0.92  | 0.46  | - | 1.98  |
| 50 | 16  | 18  | 21  | 24  | 26  | 29  | 86  | 1              | 16  | 0.19  | 0.00  | - | 1.69  |
| 51 | 25  | 23  | 25  | 27  | 29  | 31  | 91  | 1              | 25  | 1.92  | 0.19  | - | 7.75  |
| 52 | 48  | 48  | 50  | 53  | 56  | 58  | 96  | 1              | 48  | 0.06  | 0.00  | - | 0.65  |
| 53 | 20  | 23  | 25  | 28  | 31  | 34  | 89  | 1              | 20  | 0.17  | 0.00  | - | 1.72  |
| 54 | 25  | 25  | 27  | 30  | 32  | 35  | 73  | 1              | 25  | 0.14  | 0.00  | - | 1.37  |
| 55 | 8   | 8   | 10  | 13  | 16  | 18  | 54  | 1              | 8   | 0.42  | 0.00  | - | 4.24  |
| 56 | 13  | 13  | 16  | 18  | 21  | 24  | 59  | 1              | 13  | 0.21  | 0.00  | - | 2.01  |
| 57 | 23  | 25  | 28  | 30  | 33  | 34  | 68  | 1              | 23  | 0.28  | 0.01  | - | 2.63  |
| 58 | 5   | 5   | 7   | 10  | 12  | 15  | 46  | 1              | 5   | 0.97  | 0.01  | - | 9.64  |
| 59 | 16  | 16  | 18  | 21  | 23  | 26  | 60  | 1              | 16  | 0.22  | 0.00  | - | 1.99  |
| 60 | 6   | 9   | 11  | 14  | 17  | 18  | 56  | 1              | 6   | 0.69  | 0.01  | - | 6.74  |
| 61 | 25  | 28  | 30  | 33  | 36  | 39  | 93  | 1              | 25  | 0.16  | 0.00  | - | 1.43  |
| 62 | 17  | 20  | 22  | 25  | 27  | 30  | 83  | 1              | 17  | 0.26  | 0.00  | - | 2.50  |
| 63 | 60  | 50  | 51  | 49  | 49  | 53  | 96  | 2 <sup>a</sup> | 50  | 0.26  | 0.00  | - | 2.29  |
| 64 | 40  | 40  | 42  | 44  | 47  | 49  | 114 | 1              | 40  | 0.12  | 0.00  | - | 1.11  |
| 65 | 3   | 3   | 5   | 8   | 10  | 13  | 35  | 1              | 3   | 0.12  | 0.00  | - | 1.11  |
| 66 | 13  | 17  | 20  | 23  | 26  | 29  | 67  | 1              | 13  | 0.26  | 0.00  | - | 2.42  |
| 67 | 22  | 25  | 27  | 30  | 33  | 35  | 87  | 1              | 22  | 0.18  | 0.00  | - | 1.65  |
| 68 | 7   | 11  | 12  | 13  | 14  | 16  | 38  | 1              | 7   | 3.52  | 0.08  | - | 27.64 |
| 69 | 14  | 17  | 19  | 22  | 24  | 26  | 62  | 1              | 14  | 0.26  | 0.00  | - | 2.70  |
| 70 | 8   | 8   | 11  | 14  | 16  | 19  | 55  | 1              | 8   | 0.43  | 0.01  | - | 4.32  |
| 71 | 40  | 43  | 45  | 48  | 50  | 53  | 92  | 1              | 40  | 0.09  | 0.00  | - | 0.90  |
| 72 | 24  | 30  | 33  | 36  | 39  | 40  | 78  | 1              | 24  | 0.20  | 0.00  | - | 1.92  |
| 73 | 4   | 4   | 6   | 9   | 12  | 14  | 35  | 1              | 4   | 1.65  | 0.03  | - | 16.35 |
| 74 | 68  | 67  | 59  | 60  | 60  | 61  | 67  | 1              | 68  | 27.91 | 22.93 | - | 35.60 |
| 75 | 32  | 32  | 33  | 34  | 36  | 37  | 119 | 1              | 32  | 1.44  | 0.49  | - | 4.05  |
| 76 | 33  | 34  | 34  | 35  | 37  | 38  | 123 | 1              | 33  | 0.92  | 0.32  | - | 2.51  |
| 77 | 31  | 47  | 29  | 29  | 29  | 29  | 34  | 1              | 31  | 35.60 | 22.46 | - | 60.95 |
| 78 | 76  | 72  | 73  | 73  | 73  | 73  | 83  | 1              | 76  | 9.76  | 7.33  | - | 13.67 |
| 79 | 5   | 5   | 5   | 6   | 6   | 8   | 14  | 1              | 5   | 2.89  | 1.16  | - | 7.16  |
| 80 | 173 | 161 | 163 | 165 | 167 | 169 | 299 | 2 <sup>a</sup> | 161 | 0.75  | 0.01  | - | 4.68  |
| 81 | 50  | 50  | 50  | 51  | 52  | 53  | 65  | 1              | 50  | 4.84  | 3.43  | - | 7.25  |
| 82 | 13  | 13  | 13  | 14  | 16  | 18  | 48  | 1              | 13  | 0.49  | 0.06  | - | 2.18  |
| 83 | 66  | 66  | 66  | 67  | 68  | 69  | 121 | 1              | 66  | 3.97  | 2.27  | - | 7.48  |
| 84 | 63  | 62  | 62  | 63  | 64  | 65  | 123 | 1              | 63  | 1.23  | 0.65  | - | 2.44  |

|     |     |     |     |     |     |     |     |                |     |       |       |   |       |
|-----|-----|-----|-----|-----|-----|-----|-----|----------------|-----|-------|-------|---|-------|
| 85  | 143 | 144 | 145 | 145 | 146 | 147 | 264 | 1              | 143 | 4.63  | 3.28  | - | 6.95  |
| 86  | 76  | 76  | 77  | 78  | 79  | 80  | 305 | 1              | 76  | 6.51  | 3.86  | - | 11.82 |
| 87  | 43  | 37  | 28  | 29  | 29  | 30  | 84  | 2 <sup>a</sup> | 37  | 1.22  | 0.59  | - | 2.65  |
| 88  | 13  | 13  | 11  | 13  | 15  | 18  | 21  | 1              | 13  | 2.91  | 1.13  | - | 7.24  |
| 89  | 4   | 4   | 6   | 8   | 10  | 12  | 42  | 1              | 4   | 0.16  | 0.00  | - | 1.10  |
| 90  | 15  | 15  | 16  | 17  | 19  | 20  | 53  | 1              | 15  | 0.99  | 0.45  | - | 2.24  |
| 91  | 153 | 153 | 153 | 153 | 154 | 155 | 185 | 1              | 153 | 32.14 | 26.80 | - | 41.09 |
| 92  | 179 | 175 | 175 | 174 | 173 | 174 | 240 | 1              | 179 | 31.38 | 24.61 | - | 42.62 |
| 93  | 62  | 62  | 63  | 64  | 65  | 66  | 78  | 1              | 62  | 19.40 | 12.27 | - | 32.63 |
| 94  | 370 | 373 | 376 | 378 | 381 | 383 | 410 | 1              | 370 | 0.01  | 0.00  | - | 0.09  |
| 95  | 11  | 13  | 14  | 15  | 18  | 19  | 83  | 1              | 11  | 2.92  | 0.10  | - | 16.58 |
| 96  | 89  | 91  | 94  | 97  | 99  | 102 | 128 | 1              | 89  | 0.04  | 0.00  | - | 0.34  |
| 97  | 28  | 27  | 28  | 28  | 29  | 30  | 183 | 1              | 28  | 0.65  | 0.31  | - | 1.40  |
| 98  | 5   | 5   | 6   | 7   | 9   | 11  | 27  | 1              | 5   | 0.39  | 0.03  | - | 1.71  |
| 99  | 46  | 49  | 51  | 54  | 56  | 58  | 82  | 1              | 46  | 0.08  | 0.00  | - | 0.78  |
| 100 | 46  | 47  | 49  | 50  | 52  | 54  | 73  | 1              | 46  | 0.25  | 0.00  | - | 1.38  |
| 101 | 219 | 221 | 224 | 226 | 229 | 232 | 257 | 1              | 219 | 0.01  | 0.00  | - | 0.12  |
| 102 | 30  | 32  | 34  | 36  | 37  | 39  | 61  | 1              | 30  | 0.36  | 0.01  | - | 2.13  |
| 103 | 238 | 240 | 243 | 245 | 248 | 251 | 277 | 1              | 238 | 0.01  | 0.00  | - | 0.13  |
| 104 | 55  | 57  | 60  | 62  | 65  | 67  | 91  | 1              | 55  | 0.06  | 0.00  | - | 0.61  |
| 105 | 50  | 51  | 50  | 50  | 51  | 51  | 65  | 1              | 50  | 4.57  | 2.78  | - | 7.65  |
| 106 | 210 | 154 | 157 | 160 | 162 | 165 | 276 | 2 <sup>a</sup> | 154 | 0.14  | 0.00  | - | 1.39  |
| 107 | 27  | 30  | 33  | 36  | 39  | 41  | 94  | 1              | 27  | 0.11  | 0.00  | - | 1.21  |
| 108 | 45  | 45  | 47  | 50  | 52  | 54  | 166 | 1              | 45  | 0.15  | 0.00  | - | 1.26  |
| 109 | 24  | 27  | 29  | 32  | 34  | 36  | 246 | 1              | 24  | 0.08  | 0.00  | - | 0.67  |

Abbreviations: DIC, Deviance Information Criterion (values correspond to the lowest DIC or to that of the most parsimonious model if the difference between DIC values is not greater than 10 units [29]); Fol, force-of-infection; BCI, Bayesian Credible Interval. Models 1–3 are described in the main text.

<sup>a</sup> 1 change in Fol.

<sup>b</sup> 2 changes in Fol.

Survey number as in Supplementary Table 1.

**Supplementary Table 3.** Deviance Information Criterion for selecting the best model fit for subnational-level trends in the force-of-infection of Chagas disease in Colombia

| Subnational level<br>(Department) | DIC values                |                                                                                                  |       |       |       |       | Best model   | Number of discrete changes |                             |
|-----------------------------------|---------------------------|--------------------------------------------------------------------------------------------------|-------|-------|-------|-------|--------------|----------------------------|-----------------------------|
|                                   | Constant Fol<br>(Model 1) | Model with up to four discrete changes in Fol over time and five values of $\lambda_i$ (Model 2) |       |       |       |       |              |                            | Yearly changes<br>(Model 3) |
|                                   |                           | 1                                                                                                | 2     | 3     | 4     | 5     |              |                            |                             |
| Antioquia                         | <b>382</b>                | 384                                                                                              | 387   | 389   | 391   | 393   | 440          | Model 1                    | 0                           |
| Arauca                            | 648                       | 650                                                                                              | 588   | 574   | 572   | 573   | <b>419</b>   | Model 3                    | Yearly                      |
| Bolívar                           | <b>136</b>                | 133                                                                                              | 133   | 135   | 135   | 137   | 284          | Model 1                    | 0                           |
| Boyacá                            | 1,678                     | <b>1,481</b>                                                                                     | 1,483 | 1,482 | 1,482 | 1,481 | 1,558        | Model 2                    | 1                           |
| Casanare                          | 931                       | 891                                                                                              | 884   | 879   | 885   | 883   | <b>863</b>   | Model 3                    | Yearly                      |
| Cesar                             | <b>46</b>                 | 49                                                                                               | 51    | 54    | 55    | 55    | 82           | Model 1                    | 0                           |
| Cundinamarca                      | <b>46</b>                 | 47                                                                                               | 49    | 50    | 52    | 54    | 73           | Model 1                    | 0                           |
| Guainía                           | <b>24</b>                 | 27                                                                                               | 29    | 32    | 34    | 37    | 246          | Model 1                    | 0                           |
| Magdalena                         | <b>219</b>                | 221                                                                                              | 224   | 226   | 229   | 232   | 257          | Model 1                    | 0                           |
| Meta                              | <b>30</b>                 | 32                                                                                               | 34    | 36    | 37    | 39    | 61           | Model 1                    | 0                           |
| Santander Norte                   | 402                       | <b>328</b>                                                                                       | 330   | 331   | 333   | 335   | 394          | Model 2                    | 1                           |
| Santander                         | 2,407                     | 1,943                                                                                            | 1,931 | 1,911 | 1,901 | 1,902 | <b>1,544</b> | Model 3                    | Yearly                      |
| SNSM                              | <b>401</b>                | 402                                                                                              | 404   | 405   | 404   | 403   | 428          | Model 1                    | 0                           |
| Sucre                             | <b>238</b>                | 240                                                                                              | 243   | 245   | 248   | 250   | 277          | Model 1                    | 0                           |
| Tolima                            | <b>55</b>                 | 57                                                                                               | 60    | 62    | 65    | 67    | 91           | Model 1                    | 0                           |

Abbreviations: DIC, Deviance Information Criterion (numbers in bold highlight the lowest DIC value or the value for the most parsimonious model if the difference between the DIC values is not greater than 10 units [29]); Fol, force-of-infection; SNSM, Sierra Nevada de Santa Marta. Models 1–3 are described in the main text.

**Supplementary Table 4.** Deviance Information Criterion for selecting the best model fit for setting-level trends in the force-of-infection of Chagas disease in Colombia in four different settings

| Setting                | DIC values             |                                                                                                  |            |       |       |       |                          | Best model | Number of discrete changes |
|------------------------|------------------------|--------------------------------------------------------------------------------------------------|------------|-------|-------|-------|--------------------------|------------|----------------------------|
|                        | Constant Fol (Model 1) | Model with up to four discrete changes in Fol over time and five values of $\lambda_i$ (Model 2) |            |       |       |       | Yearly changes (Model 3) |            |                            |
|                        |                        | 1                                                                                                | 2          | 3     | 4     | 5     |                          |            |                            |
| Rural indigenous       | <b>1,126</b>           | 1,128                                                                                            | 1,130      | 1,130 | 1,131 | 1,133 | 1,144                    | Model 1    | 0                          |
| Rural (non-indigenous) | 3,291                  | 2,972                                                                                            | 2,955      | 2,933 | 2,919 | 2,912 | <b>2,758</b>             | Model 3    | Yearly                     |
| Urban                  | 1,057                  | 927                                                                                              | <b>912</b> | 907   | 906   | 910   | 1,060                    | Model 2    | 2                          |
| Mixed                  | 2,834                  | <b>2,676</b>                                                                                     | 2,678      | 2,680 | 2,681 | 2683  | 2,765                    | Model 2    | 1                          |

Abbreviations: DIC, Deviance Information Criterion (numbers in bold highlight the lowest DIC value or the value for the most parsimonious model if the difference between the DIC values is not greater than 10 units [29]); Fol, Force-of-infection. Models 1–3 are described in the main text.

## Supplementary References

---

- 1 Afonso AM, Ebell MH, Tarleton RL. A systematic review of high quality diagnostic tests for Chagas disease. *PLoS Negl Trop Dis* 2012;**6**:e1881. doi:10.1371/journal.pntd.0001881
- 2 McV. Messam LL, Branscum AJ, Collins MT, *et al.* Frequentist and Bayesian approaches to prevalence estimation using examples from Johnne's disease. *Anim Heal Res Rev* 2008;**9**:1–23. doi:10.1017/S1466252307001314
- 3 Rudge JW, Webster JP, Lu D-B, *et al.* Identifying host species driving transmission of schistosomiasis japonica, a multihost parasite system, in China. *Proc Natl Acad Sci U S A* 2013;**110**:11457–62. doi:10.1073/pnas.1221509110
- 4 Gordis L. Assessing the Validity and Reliability of Diagnostic and Screening Tests. In: Elsevier Saunders, ed. *Epidemiology*. Philadelphia: 2004. 88–115.
- 5 Diggle PJ, Tawn JA, Moyeed RA. Model-based geostatistics. *J R Stat Soc Ser C (Applied Stat)* 2002;**47**:299–350. doi:10.1111/1467-9876.00113
- 6 Mazzella A, Mazzella A. The Importance of the Model Choice for Experimental Semivariogram Modeling and Its Consequence in Evaluation Process. *J Eng* 2013;**2013**:1–10. doi:10.1155/2013/960105
- 7 Orozco LC, Camargo D, Gualdrón LE, *et al.* Seroprevalencia de infección por *Trypanosoma cruzi* en población urbana y rural de Guateque, Colombia. *Rev Fac Med UN Col* 1998;**48**:139–42.
- 8 Angulo-Silva VM. Ensayo de Estrategias de Control de la Transmisión Vectorial de la Enfermedad de Chagas en Santander. Informe Final CINTROP/UIS, OMS/TDR. Piedecuesta, Colombia: 2001.
- 9 Guhl F, Restrepo M, Angulo VM, *et al.* Lessons from a national survey of Chagas disease transmission risk in Colombia. *Trends Parasitol* 2005;**21**:259–62. doi:10.1016/j.pt.2005.04.011
- 10 Parra GJ, Restrepo Isaza M, Restrepo BN, *et al.* Estudio de tripanosomiasis americana en dos poblados indígenas de la Sierra Nevada de Santa Marta. Colombia. *Rev CES* 2004;**18**:43–50.
- 11 Secretaría de Salud de Casanare. Registro de Encuestas Serológicas para enfermedad de Chagas en el Departamento de Casanare. Informe ante el Ministerio de Salud y Protección Social. Yopal, Colombia: 2015.
- 12 Secretaría de Salud de Boyacá. Registro de Encuestas Serológicas para enfermedad de Chagas en el Departamento de Boyacá. Informe ante el Ministerio de Salud y Protección Social. Tunja, Colombia: 2015.
- 13 Dib JC. *Enfermedad de Chagas en las comunidades indígenas de la Sierra Nevada*

- de Santa Marta. Bogota, Colombia: : Organizacion Panamericana de la Salud 2011.
- 14 Cantillo-Barraza O, Chaverra D, Marcet P, *et al.* Trypanosoma cruzi transmission in a Colombian Caribbean region suggests that secondary vectors play an important epidemiological role. *Parasit Vectors* 2014;**7**:381. doi:10.1186/1756-3305-7-381
  - 15 Angulo-Silva VM. Rol de las poblaciones de Rhodnius prolixus de palmas en la transmisión de Trypanosoma cruzi en zonas intervenidas en los Llanos Orientales de Colombia. Informe Final CINTROP/UIS Colciencias. Bucaramanga, Colombia: 2012.
  - 16 Bianchi F, Cucunubá Z, Guhl F, *et al.* Follow-up of an Asymptomatic Chagas Disease Population of Children after Treatment with Nifurtimox (Lampit) in a Sylvatic Endemic Transmission Area of Colombia. *PLoS Negl Trop Dis* 2015;**9**. doi:10.1371/journal.pntd.0003465
  - 17 Cucunuba Z, Valencia C, Flórez C, *et al.* Pilot program for surveillance of congenital Chagas disease in Colombia 2010-2011. *Int. J. Infect. Dis.* 2012;**16**:e343. doi:10.1016/j.ijid.2012.05.412
  - 18 Cucunubá ZM, Puerta CJ, Floréz AC, *et al.* Informe técnico final ante Colciencias. Proyecto “Desarrollo e implementación de un programa piloto de vigilancia de Chagas congénito en Colombia. Bogotá, Colombia: 2013.
  - 19 Cucunubá ZM, Flórez AC, Cárdenas A, *et al.* Prevalence and risk factors for Chagas disease in pregnant women in Casanare, Colombia. *Am J Trop Med Hyg* 2012;**87**:837–42. doi:10.4269/ajtmh.2012.12-0086
  - 20 Gutierrez FRS, Trujillo Güiza ML, Escobar Martínez M del C. Prevalence of Trypanosoma cruzi infection among people aged 15 to 89 years inhabiting the Department of Casanare (Colombia). *PLoS Negl Trop Dis* 2013;**7**:e2113. doi:10.1371/journal.pntd.0002113
  - 21 Secretaría de Salud de Antioquia. Registro de Encuestas Serológicas para enfermedad de Chagas en el Departamento de Antioquia. Informe ante el Ministerio de Salud y Protección Social. Medellín, Colombia: 2015.
  - 22 Cantillo-Barraza O, Garcés E, Gómez-Palacio A, *et al.* Eco-epidemiological study of an endemic Chagas disease region in northern Colombia reveals the importance of Triatoma maculata (Hemiptera: Reduviidae), dogs and Didelphis marsupialis in Trypanosoma cruzi maintenance. *Parasit Vectors* 2015;**8**:482. doi:10.1186/s13071-015-1100-2
  - 23 Castellanos-Domínguez YZ, Cucunubá ZM, Orozco LC, *et al.* Risk factors associated with Chagas disease in pregnant women in Santander, a highly endemic Colombian area. *Trop Med Int Health* 2016;**21**:140–8. doi:10.1111/tmi.12634
  - 24 Organización Panamericana de la Salud. Diagnóstico de situación de salud del pueblo Hitnú de Arauca. Informe ante el Ministerio de Salud y Protección Social.

- Bogotá, Colombia: 2012.
- 25 Médicos Sin Fronteras. *Haciendo Visible lo Invisible: Chagas en el Catatumbo, Norte de Santander, Colombia 2011-2012*. Cúcuta: 2013.
  - 26 Secretaría de Salud de Santander. *Registro de Encuestas Serológicas para enfermedad de Chagas en el Departamento de Santander. Informe ante el Ministerio de Salud y Protección Social*. Bucaramanga, Colombia: 2015.
  - 27 Secretaría de Salud de Guainía. *Registro de Encuestas Serológicas para enfermedad de Chagas en el Departamento de Guainía. Informe ante el Ministerio de Salud y Protección Social*. Puerto Inírida, Colombia: 2015.
  - 28 Valencia-Hernández CA, Caicedo A, Escribano D, *et al*. Pilot program for paediatric Chagas disease in remote indigenous communities in the Sierra Nevada de Santa Marta. In: *9th European Congress on Tropical Medicine and International Health*. Basel: 2015. A-744-0007-00331.
  - 29 Spiegelhalter DJ, Best NG, Carlin BP, *et al*. Bayesian measures of model complexity and fit. *J R Stat Soc Ser B* 2002;**64**:583–639. doi:10.1111/1467-9868.00353
